# Supplementary material for: Mechanistic study of CuH-catalyzed hydroarylation of alkenes with polyfluoroarenes involving C–F bond functionalization: noncovalent interaction-controlled regioselectivity
Source: Royal Society of Chemistry journal article supplement (doi:10.1039/d3qo01368e), 2023-01-01
Supplement: d3qo01368e1.pdf [file d3qo01368e1.pdf]

## Electronic Supplementary Information

### Mechanistic Study of CuH-Catalyzed Hydroarylation of Alkenes with Polyfluoroarenes Involving C–F Bond Functionalization: Noncovalent Interaction-Controlled Regioselectivity

Xia Zhao,<sup>a</sup> Wen-Yan Tong,<sup>b</sup> and Xiaotai Wang<sup>\*b</sup>

<sup>a</sup> College of Medical Engineering and the Key Laboratory for Medical Functional Nanomaterials, Jining Medical University, Jining 272067, P. R. China

<sup>b</sup> Department of Chemistry, Xi'an Jiaotong-Liverpool University, Suzhou 215123, China

\*Corresponding author: xiaotai.wang@xjtlu.edu.cn

#### Table of Contents

|                                                                   |        |
|-------------------------------------------------------------------|--------|
| ■ Fig. S1                                                         | S2     |
| ■ Cartesian coordinates and energies for the optimized structures | S3–S32 |

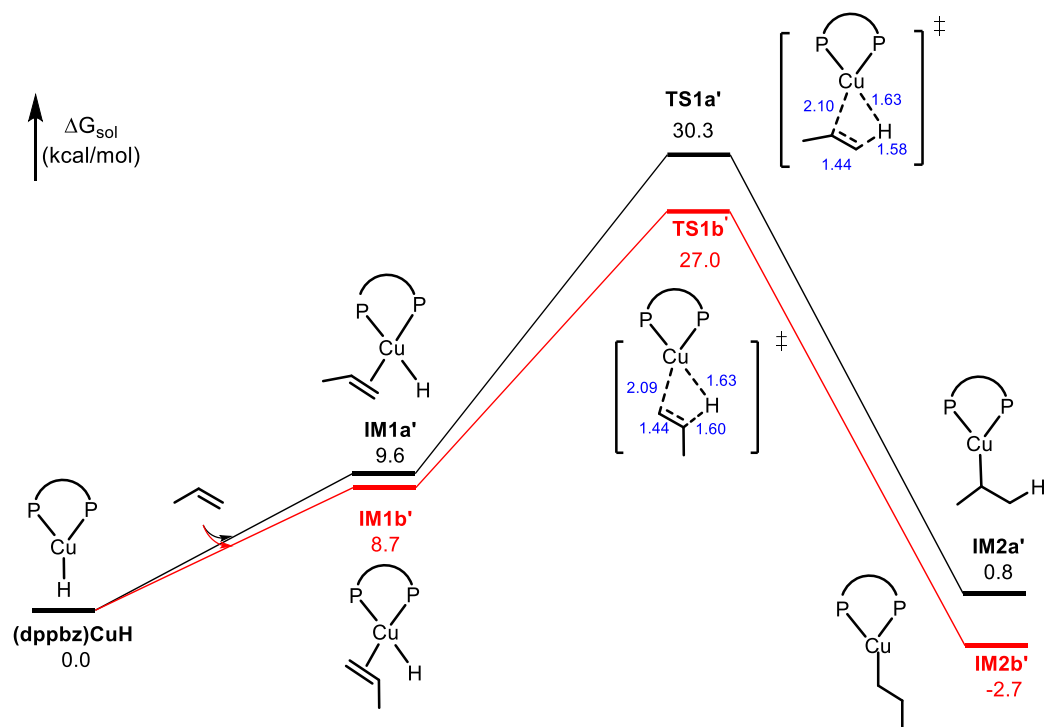

**Fig. S1** Energy changes upon replacing groups in TS1a and TS1b.

## Cartesian coordinates and energies of the optimized structures

|                                       |             |             |             |                                       |             |             |             |
|---------------------------------------|-------------|-------------|-------------|---------------------------------------|-------------|-------------|-------------|
| <b>(dppbz)CuH</b>                     |             |             |             | C                                     | 1.84815900  | 1.37793100  | -0.09506000 |
| SCF Energy = -2038.77348873 a.u.      |             |             |             | C                                     | 1.53280000  | 2.04030000  | 1.09931900  |
| Gibbs Free Energy = -2038.384607 a.u. |             |             |             | C                                     | 1.73310500  | 3.41806500  | 1.21169900  |
|                                       |             |             |             | C                                     | 2.26097700  | 4.14217900  | 0.14090400  |
| Cu                                    | -0.00740900 | -0.69020400 | -2.11283100 | C                                     | 2.58300000  | 3.48685700  | -1.05134700 |
| C                                     | -0.79541700 | -0.96096200 | 1.08594700  | C                                     | 2.36859700  | 2.11446400  | -1.17347700 |
| C                                     | -1.52324800 | -1.42373600 | 2.19033200  | H                                     | 1.11669500  | 1.48839300  | 1.93566300  |
| C                                     | -0.86341500 | -1.89329800 | 3.32713100  | H                                     | 1.47250300  | 3.92457000  | 2.13658400  |
| C                                     | 0.53253100  | -1.90466700 | 3.37051700  | H                                     | 2.41420500  | 5.21384000  | 0.23126100  |
| C                                     | 1.26945400  | -1.45055400 | 2.27560100  | H                                     | 2.98909000  | 4.04581700  | -1.88967100 |
| C                                     | 0.62059300  | -0.97809100 | 1.12635800  | H                                     | 2.59848500  | 1.61136700  | -2.10933500 |
| H                                     | -2.60864000 | -1.42155000 | 2.16073100  | C                                     | 3.17426700  | -1.20781500 | -0.24697100 |
| H                                     | -1.43933300 | -2.25175700 | 4.17557900  | C                                     | 4.26028400  | -0.62581200 | 0.42529400  |
| H                                     | 1.04853300  | -2.27153200 | 4.25313500  | C                                     | 5.48106700  | -1.29956800 | 0.49873600  |
| H                                     | 2.35421900  | -1.47235800 | 2.31366100  | C                                     | 5.62640100  | -2.55692000 | -0.09381800 |
| P                                     | -1.59393800 | -0.30648600 | -0.44880300 | C                                     | 4.54975700  | -3.13973100 | -0.76812600 |
| P                                     | 1.52883900  | -0.40788800 | -0.37938500 | C                                     | 3.33094200  | -2.46539200 | -0.85147300 |
| C                                     | -1.73921100 | 1.48961800  | -0.08527400 | H                                     | 4.15409400  | 0.35056000  | 0.88863000  |
| C                                     | -2.05107200 | 1.99215100  | 1.18830700  | H                                     | 6.31789700  | -0.84235400 | 1.01938600  |
| C                                     | -2.06886600 | 3.36873300  | 1.41468700  | H                                     | 6.57774700  | -3.07822900 | -0.03564800 |
| C                                     | -1.76242000 | 4.25422800  | 0.37709300  | H                                     | 4.66173700  | -4.11279700 | -1.23794200 |
| C                                     | -1.44591700 | 3.76169900  | -0.89087400 | H                                     | 2.49864000  | -2.91008200 | -1.39194400 |
| C                                     | -1.43546700 | 2.38519300  | -1.12202500 | H                                     | 0.04172900  | -1.00488000 | -3.64568200 |
| H                                     | -2.26156100 | 1.30984100  | 2.00647000  |                                       |             |             |             |
| H                                     | -2.30915600 | 3.74963300  | 2.40337100  | <b>S1</b>                             |             |             |             |
| H                                     | -1.76146500 | 5.32500900  | 0.56017000  | SCF Energy = -540.8768568 a.u.        |             |             |             |
| H                                     | -1.19312900 | 4.44552900  | -1.69574500 | Gibbs Free Energy = -540.6999078 a.u. |             |             |             |
| H                                     | -1.16891600 | 1.99826000  | -2.10254100 |                                       |             |             |             |
| C                                     | -3.29279100 | -0.99801000 | -0.39737500 | C                                     | 0.69698900  | -1.04843700 | -0.30977000 |
| C                                     | -3.46209300 | -2.29044700 | -0.92275500 | C                                     | -0.08986800 | 0.07230700  | 0.02140000  |
| C                                     | -4.71759600 | -2.89747000 | -0.91280600 | C                                     | 0.57880300  | 1.25933500  | 0.36498600  |
| C                                     | -5.82099100 | -2.21361300 | -0.39363600 | C                                     | 1.96952200  | 1.32127800  | 0.37622800  |
| C                                     | -5.66332300 | -0.92239000 | 0.11492500  | C                                     | 2.75640800  | 0.20287400  | 0.04805500  |
| C                                     | -4.40518200 | -0.31509100 | 0.11646000  | C                                     | 2.08496000  | -0.98631600 | -0.29650700 |
| H                                     | -2.60884900 | -2.81588100 | -1.34546600 | H                                     | 0.21178900  | -1.97394200 | -0.60563800 |
| H                                     | -4.83658900 | -3.89796800 | -1.31892000 | H                                     | 0.00504300  | 2.13655100  | 0.64884200  |
| H                                     | -6.80082100 | -2.68269700 | -0.39338300 | H                                     | 2.45961300  | 2.25149400  | 0.65371700  |
| H                                     | -6.51968400 | -0.38487400 | 0.51265700  | C                                     | 4.22239000  | 0.32616900  | 0.07957800  |
| H                                     | -4.29565100 | 0.68854200  | 0.51415200  | C                                     | 5.12400300  | -0.63270400 | -0.17291200 |

|   |             |             |             |   |             |             |             |
|---|-------------|-------------|-------------|---|-------------|-------------|-------------|
| H | 4.58691900  | 1.31943200  | 0.34159900  | H | 2.54496400  | -2.19101900 | 1.82596000  |
| H | 2.65277200  | -1.87102200 | -0.56864600 | H | 0.88766200  | -1.14463300 | 0.33596900  |
| H | 4.84669400  | -1.64976100 | -0.43761800 | C | 0.26746500  | 3.24849600  | -0.16913300 |
| H | 6.18800500  | -0.42095600 | -0.12002000 | C | -0.69040700 | 4.26536200  | -0.32020600 |
| C | -1.57213600 | 0.00098500  | 0.00381800  | C | -0.30140800 | 5.55565700  | -0.68364800 |
| C | -2.34443000 | 1.10458400  | -0.40300500 | C | 1.04509900  | 5.84745000  | -0.91683900 |
| C | -2.24450300 | -1.17210200 | 0.39312600  | C | 2.00255900  | 4.83817800  | -0.78717100 |
| C | -3.73754300 | 1.03728800  | -0.41899500 | C | 1.61850400  | 3.54762100  | -0.41946200 |
| H | -1.84888700 | 2.01308900  | -0.73268300 | H | -1.74106700 | 4.04916500  | -0.15418200 |
| C | -3.63759200 | -1.23942200 | 0.37529200  | H | -1.05387400 | 6.33254200  | -0.78713400 |
| H | -1.67188400 | -2.02928800 | 0.73494900  | H | 1.34492500  | 6.85217200  | -1.20101700 |
| C | -4.39126300 | -0.13495800 | -0.03037900 | H | 3.05166100  | 5.05394100  | -0.97038500 |
| H | -4.31309800 | 1.89977200  | -0.74398300 | H | 2.37293700  | 2.77314100  | -0.32056100 |
| H | -4.13511900 | -2.15358700 | 0.68752100  | C | -1.70533800 | -2.06849500 | 0.67078900  |
| H | -5.47629700 | -0.18706800 | -0.04352900 | C | -1.50348300 | -2.17358800 | 2.05462400  |

**IM1a**

SCF Energy = -2579.666711 a.u.

Gibbs Free Energy = -2579.074346 a.u.

|   |             |             |             |   |             |             |             |
|---|-------------|-------------|-------------|---|-------------|-------------|-------------|
| C | -1.66001800 | 1.60203800  | 1.30881800  | C | -0.25510200 | -4.22519000 | 1.73544400  |
| C | -1.73482900 | 2.56770000  | 2.32206800  | C | -0.46179300 | -4.13424200 | 0.35540800  |
| C | -2.79864200 | 2.57243700  | 3.22413300  | C | -1.17743200 | -3.06025600 | -0.17307100 |
| C | -3.80126000 | 1.60466300  | 3.12553900  | H | -1.89288600 | -1.41224000 | 2.72240800  |
| C | -3.73637500 | 0.63285500  | 2.12667900  | H | -0.61786400 | -3.30857200 | 3.65402700  |
| C | -2.67179100 | 0.61830300  | 1.21372700  | H | 0.31439300  | -5.05342100 | 2.14752800  |
| H | -0.96252800 | 3.32675000  | 2.40073100  | H | -0.05510900 | -4.89170400 | -0.30879300 |
| H | -2.84502200 | 3.33053700  | 4.00092900  | H | -1.31465700 | -2.97904000 | -1.24748100 |
| H | -4.63269400 | 1.60529000  | 3.82469000  | C | -4.27176600 | -1.21868300 | -0.38102700 |
| H | -4.51941100 | -0.11588200 | 2.05554100  | C | -4.82792100 | -2.30685900 | 0.30900200  |
| P | -0.24849900 | 1.51005000  | 0.11113600  | C | -6.14913500 | -2.68965000 | 0.06721900  |
| P | -2.54514800 | -0.64245200 | -0.13397100 | C | -6.92497300 | -1.98960400 | -0.86042400 |
| C | 1.07024500  | 0.81911000  | 1.20900000  | C | -6.37590300 | -0.90573200 | -1.55189400 |
| C | 1.72769100  | 1.58250300  | 2.18991300  | C | -5.05389000 | -0.52500000 | -1.31902300 |
| C | 2.67511300  | 0.99228900  | 3.02665500  | H | -4.23161500 | -2.85495000 | 1.03233500  |
| C | 2.97100400  | -0.36982100 | 2.90311600  | H | -6.57182300 | -3.53408900 | 0.60468200  |
| C | 2.31707200  | -1.13546600 | 1.93759300  | H | -7.95204700 | -2.29056400 | -1.04734100 |
| C | 1.37628900  | -0.54302200 | 1.09211700  | H | -6.97395600 | -0.36197500 | -2.27790400 |
| H | 1.50849300  | 2.64058400  | 2.29419300  | H | -4.61805100 | 0.31075800  | -1.86094100 |
| H | 3.18158200  | 1.59453400  | 3.77606900  | C | 3.30468400  | 0.15763400  | -1.72125200 |
| H | 3.71408900  | -0.82651200 | 3.55071800  | C | 3.80473400  | -1.08826500 | -1.29631800 |
|   |             |             |             | C | 3.00222900  | -2.22077700 | -1.50891500 |
|   |             |             |             | C | 1.74319700  | -2.10856000 | -2.09404000 |
|   |             |             |             | C | 1.23428800  | -0.86184200 | -2.49781300 |
|   |             |             |             | C | 2.05236800  | 0.27016800  | -2.30945000 |

|    |             |             |             |   |             |             |             |
|----|-------------|-------------|-------------|---|-------------|-------------|-------------|
| H  | 3.90876700  | 1.05028900  | -1.58704700 | C | 1.71071100  | 1.30686600  | 2.25304700  |
| H  | 3.34851000  | -3.19430100 | -1.17378200 | C | 2.62481000  | 0.62434500  | 3.05573100  |
| H  | 1.13163000  | -2.99753500 | -2.22037600 | C | 2.86119300  | -0.73957200 | 2.84938000  |
| H  | 1.69192200  | 1.25197500  | -2.59971700 | C | 2.18037400  | -1.41826400 | 1.83794000  |
| C  | 5.11137400  | -1.19231200 | -0.60431700 | C | 1.27418000  | -0.73422700 | 1.02521900  |
| C  | 5.97352400  | -2.27871200 | -0.83581000 | H | 1.53559900  | 2.36565800  | 2.41799600  |
| C  | 5.50770700  | -0.21212400 | 0.32418600  | H | 3.15307500  | 1.15558500  | 3.84272100  |
| C  | 7.19257600  | -2.38028800 | -0.16490900 | H | 3.57905300  | -1.26636700 | 3.47166700  |
| H  | 5.69407600  | -3.03688500 | -1.56185800 | H | 2.36320300  | -2.47420800 | 1.66422500  |
| C  | 6.72724900  | -0.31378200 | 0.99360500  | H | 0.76758700  | -1.25563000 | 0.22209300  |
| H  | 4.83978300  | 0.61455300  | 0.54568200  | C | 0.39060700  | 3.14072000  | -0.12109000 |
| C  | 7.57581900  | -1.39775400 | 0.75209000  | C | -0.51699600 | 4.19368000  | -0.32717100 |
| H  | 7.84726900  | -3.22424400 | -0.36494300 | C | -0.05813700 | 5.46406600  | -0.67740200 |
| H  | 7.00969600  | 0.44967600  | 1.71352200  | C | 1.31003900  | 5.69855300  | -0.84076500 |
| H  | 8.52529400  | -1.47711600 | 1.27410700  | C | 2.21755300  | 4.65301000  | -0.65463400 |
| Cu | -1.46292000 | 0.54405400  | -1.80701200 | C | 1.76340800  | 3.38132300  | -0.30028600 |
| C  | -0.11186400 | -0.78711500 | -3.08922400 | H | -1.58305500 | 4.02246800  | -0.20947800 |
| C  | -0.63731400 | 0.28573300  | -3.77182100 | H | -0.77137100 | 6.27050100  | -0.82356800 |
| H  | -0.65673500 | -1.72826600 | -3.12010200 | H | 1.66505000  | 6.68809000  | -1.11427200 |
| H  | -0.05981400 | 1.18540100  | -3.96482000 | H | 3.28262200  | 4.82491900  | -0.78363200 |
| H  | -1.53651300 | 0.16340900  | -4.36776100 | H | 2.47801400  | 2.57650100  | -0.16263000 |
| H  | -2.38198300 | 1.79173100  | -2.16175400 | C | -1.99795100 | -2.04567400 | 0.69565900  |

**TS1a**

SCF Energy = -2579.647918 a.u.

Gibbs Free Energy = -2579.05611 a.u.

|    |             |             |             |   |             |             |             |
|----|-------------|-------------|-------------|---|-------------|-------------|-------------|
| Cu | -1.18621800 | 0.30342400  | -1.63690000 | H | -2.53375600 | -1.49290000 | 2.71693100  |
| C  | -1.66276600 | 1.61940000  | 1.30404800  | H | -1.48574900 | -3.47916000 | 3.74520200  |
| C  | -1.69608100 | 2.58754400  | 2.31724900  | H | -0.34043100 | -5.16753500 | 2.32592700  |
| C  | -2.79227100 | 2.68282400  | 3.17479600  | H | -0.25424500 | -4.85693500 | -0.14263000 |
| C  | -3.87036500 | 1.80683200  | 3.02881800  | H | -1.27179500 | -2.84414400 | -1.17140000 |
| C  | -3.84726600 | 0.83231800  | 2.03049300  | C | -4.41644500 | -0.96460200 | -0.52827100 |
| C  | -2.74895400 | 0.72343900  | 1.16499900  | C | -5.12626900 | -1.98181900 | 0.12796500  |
| H  | -0.86805700 | 3.28094900  | 2.42925500  | C | -6.46024000 | -2.23135000 | -0.20231900 |
| H  | -2.80576200 | 3.44185000  | 3.95186700  | C | -7.09577800 | -1.46786700 | -1.18475100 |
| H  | -4.72835500 | 1.88067500  | 3.69093700  | C | -6.39303000 | -0.45517800 | -1.84430900 |
| H  | -4.68925700 | 0.15528600  | 1.92299600  | C | -5.05775400 | -0.20909800 | -1.52355100 |
| P  | -0.22592700 | 1.43467000  | 0.14937300  | H | -4.64019300 | -2.58018900 | 0.89251000  |
| P  | -2.66253800 | -0.55985700 | -0.16612100 | H | -7.00207200 | -3.02237600 | 0.30867600  |
| C  | 1.03283000  | 0.63081100  | 1.22453100  | H | -8.13297400 | -1.66549500 | -1.44048900 |

|   |             |             |             |   |             |             |             |
|---|-------------|-------------|-------------|---|-------------|-------------|-------------|
| H | -6.88125600 | 0.13582300  | -2.61415000 | H | -3.62519200 | 3.57632800  | 3.44984900  |
| H | -4.50436700 | 0.56782700  | -2.04605100 | H | -5.36566100 | 1.84579400  | 3.03514900  |
| C | 3.41540000  | 0.18785000  | -1.71435600 | H | -4.92472500 | 0.00065700  | 1.45238000  |
| C | 3.96440000  | -1.04095600 | -1.29705300 | P | -0.32548200 | 1.44760900  | 0.31946600  |
| C | 3.20105200  | -2.19749300 | -1.54483400 | P | -2.54740100 | -0.66749900 | -0.26403100 |
| C | 1.94440000  | -2.12562800 | -2.13271100 | C | 0.69560500  | 0.48119900  | 1.50347000  |
| C | 1.36563200  | -0.88947400 | -2.51263500 | C | 0.73708600  | 0.75793500  | 2.87959300  |
| C | 2.16501000  | 0.26544700  | -2.31174100 | C | 1.51826700  | -0.02673600 | 3.72805100  |
| H | 3.98563400  | 1.10175600  | -1.56810700 | C | 2.26242000  | -1.09261300 | 3.21094200  |
| H | 3.58071000  | -3.16556500 | -1.22759800 | C | 2.22317500  | -1.37374400 | 1.84408400  |
| H | 1.37034100  | -3.03885800 | -2.27312700 | C | 1.44150600  | -0.59005000 | 0.99242800  |
| C | 0.01528500  | -0.85141000 | -3.04732700 | H | 0.15451600  | 1.57835400  | 3.28866600  |
| C | -0.59524200 | 0.27947200  | -3.67561000 | H | 1.54442200  | 0.19039200  | 4.79236100  |
| H | -0.47769100 | -1.81241100 | -3.17216500 | H | 2.86818900  | -1.70380200 | 3.87422100  |
| H | 1.77555400  | 1.24122100  | -2.58739000 | H | 2.79843200  | -2.19876800 | 1.43640100  |
| H | 0.03403300  | 1.11299700  | -3.97707300 | H | 1.40747000  | -0.81173200 | -0.06849300 |
| H | -1.38934900 | 0.06985500  | -4.38607900 | C | 0.41473000  | 3.12337200  | 0.29979100  |
| H | -1.59454700 | 1.28832700  | -2.83812000 | C | -0.30929500 | 4.16924400  | -0.30113100 |
| C | 5.25590500  | -1.10688700 | -0.57907400 | C | 0.26666000  | 5.42956300  | -0.45643600 |
| C | 6.15862800  | -2.16774400 | -0.78541400 | C | 1.57926200  | 5.65926200  | -0.03160600 |
| C | 5.60798300  | -0.11604000 | 0.35890300  | C | 2.30870800  | 4.62237600  | 0.55374800  |
| C | 7.36352400  | -2.23458600 | -0.08532600 | C | 1.73206600  | 3.36108400  | 0.72156800  |
| H | 5.91996900  | -2.93500600 | -1.51670900 | H | -1.32640700 | 3.99633700  | -0.64365000 |
| C | 6.81570400  | -0.17982000 | 1.05374300  | H | -0.30696900 | 6.23083000  | -0.91394200 |
| H | 4.91289400  | 0.69211900  | 0.56588400  | H | 2.02997900  | 6.63930100  | -0.15906700 |
| C | 7.70093200  | -1.23979500 | 0.83693800  | H | 3.32945600  | 4.79291200  | 0.88466700  |
| H | 8.04547000  | -3.06102800 | -0.26820000 | H | 2.30962900  | 2.56368400  | 1.17794600  |
| H | 7.05963400  | 0.59388000  | 1.77728300  | C | -1.76885900 | -2.01339500 | 0.71445200  |
| H | 8.64010300  | -1.29115900 | 1.38072400  | C | -1.79464500 | -2.06480800 | 2.11507100  |

**IM2a**

SCF Energy = -2579.69465 a.u.

Gibbs Free Energy = -2579.09965 a.u.

|   |             |            |            |   |             |             |             |
|---|-------------|------------|------------|---|-------------|-------------|-------------|
| C | -1.93177600 | 1.63951500 | 1.20973300 | H | -2.33574000 | -1.31164300 | 2.67912400  |
| C | -2.20032900 | 2.68404300 | 2.10526100 | H | -1.11551100 | -3.09593700 | 3.87752800  |
| C | -3.43032600 | 2.76012200 | 2.76000300 | H | 0.15405000  | -4.81427200 | 2.60775000  |
| C | -4.40733200 | 1.78953500 | 2.52678100 | H | 0.19689800  | -4.73743200 | 0.12073300  |
| C | -4.15673500 | 0.74590500 | 1.63461800 | H | -0.99644500 | -2.92942700 | -1.08251800 |
| C | -2.92733900 | 0.65977000 | 0.96633400 | C | -4.18834300 | -1.31507300 | -0.76392200 |
| H | -1.44755700 | 3.44546200 | 2.28505700 | C | -4.86073900 | -2.32683400 | -0.06084200 |
|   |             |            |            | C | -6.11515400 | -2.76322000 | -0.49185000 |

|    |             |             |             |    |             |             |             |
|----|-------------|-------------|-------------|----|-------------|-------------|-------------|
| C  | -6.70750700 | -2.19244800 | -1.62183900 | Cu | 0.77004700  | -1.52992100 | -0.74638200 |
| C  | -6.04106800 | -1.18702800 | -2.32784900 | C  | 1.16722700  | 0.21288000  | 1.98923300  |
| C  | -4.78338600 | -0.75473000 | -1.90533700 | C  | 0.84841100  | 0.46782100  | 3.32893000  |
| H  | -4.40555600 | -2.77272600 | 0.81874200  | C  | 1.81705300  | 0.33775300  | 4.32616100  |
| H  | -6.62978700 | -3.54813400 | 0.05536600  | C  | 3.11615100  | -0.04962600 | 3.99168300  |
| H  | -7.68313700 | -2.53474200 | -1.95522600 | C  | 3.44423600  | -0.32028200 | 2.66170400  |
| H  | -6.49509700 | -0.74707400 | -3.21123700 | C  | 2.47977900  | -0.19939900 | 1.65280200  |
| H  | -4.25500700 | 0.01490500  | -2.46353100 | H  | -0.16229300 | 0.76360800  | 3.59420200  |
| C  | 3.50005500  | 0.61513500  | -1.54016600 | H  | 1.55588500  | 0.53734700  | 5.36165600  |
| C  | 3.88846700  | -0.73501700 | -1.47441200 | H  | 3.87270200  | -0.15041600 | 4.76473400  |
| C  | 3.04574000  | -1.67157800 | -2.10797000 | H  | 4.45176600  | -0.63776300 | 2.41145200  |
| C  | 1.86942800  | -1.28059800 | -2.73441700 | P  | -0.04414600 | 0.38484800  | 0.60372300  |
| C  | 1.44360200  | 0.07353800  | -2.77043900 | P  | 2.81567900  | -0.63949500 | -0.11077600 |
| C  | 2.32726100  | 1.01072700  | -2.17559100 | C  | 0.17665900  | 2.16565000  | 0.16210100  |
| H  | 4.13574400  | 1.37518400  | -1.09244600 | C  | 0.37394900  | 3.17064700  | 1.12421500  |
| H  | 3.30164200  | -2.72790500 | -2.07474800 | C  | 0.58359600  | 4.49385100  | 0.73466300  |
| H  | 1.23003900  | -2.03792900 | -3.18481200 | C  | 0.60735600  | 4.83107600  | -0.62174500 |
| H  | 2.07270000  | 2.06560900  | -2.18550900 | C  | 0.41891800  | 3.83968100  | -1.58631700 |
| C  | 5.09524500  | -1.15874100 | -0.73078200 | C  | 0.20492600  | 2.51653700  | -1.19525300 |
| C  | 5.89680600  | -2.22830100 | -1.17487700 | H  | 0.37289600  | 2.91937100  | 2.18019000  |
| C  | 5.46366500  | -0.51543800 | 0.46779600  | H  | 0.73488100  | 5.26032000  | 1.48983100  |
| C  | 7.01859900  | -2.63609400 | -0.45257100 | H  | 0.78099500  | 5.86007500  | -0.92393700 |
| H  | 5.64802700  | -2.72952800 | -2.10622000 | H  | 0.45158000  | 4.09062300  | -2.64260900 |
| C  | 6.58934700  | -0.91873500 | 1.18586400  | H  | 0.08464700  | 1.74880600  | -1.95072600 |
| H  | 4.84204700  | 0.28738800  | 0.85293500  | C  | -1.68901100 | 0.29742000  | 1.41891400  |
| C  | 7.37351000  | -1.98269500 | 0.73114700  | C  | -2.14740900 | -0.98142800 | 1.78092000  |
| H  | 7.62356900  | -3.46073800 | -0.82080000 | C  | -3.40844600 | -1.14297900 | 2.35282200  |
| H  | 6.84638300  | -0.40913100 | 2.11100700  | C  | -4.23788200 | -0.03496600 | 2.55106500  |
| H  | 8.24825700  | -2.29945900 | 1.29231100  | C  | -3.79627100 | 1.23547700  | 2.17845900  |
| Cu | -0.96576400 | 0.20804800  | -1.63919800 | C  | -2.52715000 | 1.40435300  | 1.61857300  |
| C  | 0.12538400  | 0.44701900  | -3.31941800 | H  | -1.51684300 | -1.84612700 | 1.59361700  |
| C  | -0.01824700 | 1.88476500  | -3.83152100 | H  | -3.75044200 | -2.13686800 | 2.62765700  |
| H  | -0.17294600 | -0.26685300 | -4.09766500 | H  | -5.22852500 | -0.16428500 | 2.97628000  |
| H  | 0.73741300  | 2.15491500  | -4.59055300 | H  | -4.44013500 | 2.09925500  | 2.31949700  |
| H  | -1.00450100 | 2.03018700  | -4.28724900 | H  | -2.19963700 | 2.39836200  | 1.33248600  |
| H  | 0.06381900  | 2.62570100  | -3.02752800 | C  | 3.36319000  | 0.93864000  | -0.87996900 |
|    |             |             |             | C  | 3.64376200  | 2.09895400  | -0.14369300 |
|    |             |             |             | C  | 3.97823000  | 3.28545200  | -0.80014400 |
|    |             |             |             | C  | 4.04879700  | 3.32275500  | -2.19423800 |
|    |             |             |             | C  | 3.78195900  | 2.16758100  | -2.93506400 |
|    |             |             |             | C  | 3.43332900  | 0.98546900  | -2.28255200 |

**IM1b**  
SCF Energy = -2579.66678 a.u.  
Gibbs Free Energy = -2579.072976 a.u.

|   |             |             |             |                                       |             |             |             |
|---|-------------|-------------|-------------|---------------------------------------|-------------|-------------|-------------|
| H | 3.58323300  | 2.08386900  | 0.93955000  | H                                     | -8.18228600 | -1.65018800 | 1.55881600  |
| H | 4.17651600  | 4.18223100  | -0.22013800 | H                                     | -9.44404300 | 0.24426800  | 0.54701000  |
| H | 4.30375300  | 4.24858900  | -2.70219800 |                                       |             |             |             |
| H | 3.83337600  | 2.19046400  | -4.02012900 | <b>TS1b</b>                           |             |             |             |
| H | 3.20422600  | 0.09656300  | -2.86359800 | SCF Energy = -2579.634713 a.u.        |             |             |             |
| C | 4.33239400  | -1.67117600 | -0.04282700 | Gibbs Free Energy = -2579.042111 a.u. |             |             |             |
| C | 5.62949100  | -1.14459400 | -0.14128600 |                                       |             |             |             |
| C | 6.73683900  | -1.99290800 | -0.07376300 | Cu                                    | 0.72536900  | -0.97779600 | -0.99902000 |
| C | 6.55887200  | -3.36855200 | 0.09635000  | C                                     | 1.14018800  | 0.45123800  | 1.89569100  |
| C | 5.26899200  | -3.89859900 | 0.19316400  | C                                     | 0.79477700  | 0.86788300  | 3.18750600  |
| C | 4.15956300  | -3.05577300 | 0.11719100  | C                                     | 1.63970700  | 0.60472800  | 4.26751500  |
| H | 5.77521300  | -0.07628700 | -0.27022000 | C                                     | 2.84132200  | -0.07661900 | 4.06441000  |
| H | 7.73814000  | -1.57841500 | -0.15164900 | C                                     | 3.19751600  | -0.49822300 | 2.78157500  |
| H | 7.42230900  | -4.02586200 | 0.14867400  | C                                     | 2.35595300  | -0.24415900 | 1.69064700  |
| H | 5.12623100  | -4.96808500 | 0.32002900  | H                                     | -0.14427700 | 1.38703400  | 3.35363800  |
| H | 3.15343600  | -3.46283600 | 0.18082700  | H                                     | 1.35668200  | 0.92782100  | 5.26537500  |
| C | -3.61439900 | 0.02393300  | -1.64699500 | H                                     | 3.49924100  | -0.28623600 | 4.90302600  |
| C | -4.50135500 | -0.98418200 | -1.22605000 | H                                     | 4.12950200  | -1.03494000 | 2.63311800  |
| C | -4.04358400 | -2.31320100 | -1.26795500 | P                                     | 0.07278500  | 0.75466400  | 0.41469600  |
| C | -2.75475000 | -2.61648900 | -1.69332300 | P                                     | 2.73894700  | -0.81129100 | -0.02930400 |
| C | -1.86465100 | -1.60790700 | -2.09963100 | C                                     | 0.61375900  | 2.43413300  | -0.11497500 |
| C | -2.32978300 | -0.28058700 | -2.08061700 | C                                     | 0.74921700  | 3.51208700  | 0.77513700  |
| H | -3.92282600 | 1.06382800  | -1.60193600 | C                                     | 1.23662700  | 4.73837600  | 0.32339500  |
| H | -4.70889200 | -3.12057400 | -0.97669400 | C                                     | 1.59997100  | 4.89789700  | -1.01823900 |
| H | -2.42228300 | -3.65128400 | -1.70290300 | C                                     | 1.47109700  | 3.82993100  | -1.90797500 |
| C | -0.49332800 | -1.97628500 | -2.50192000 | C                                     | 0.97864400  | 2.60270400  | -1.45808500 |
| C | 0.50320900  | -1.11643300 | -2.89776600 | H                                     | 0.48279900  | 3.39040000  | 1.82093800  |
| H | -0.32234200 | -3.04446300 | -2.61524700 | H                                     | 1.34077000  | 5.56706700  | 1.01833100  |
| H | -1.67500500 | 0.52782600  | -2.38535500 | H                                     | 1.98899900  | 5.85124400  | -1.36503700 |
| H | 1.40829800  | -1.51406000 | -3.34653400 | H                                     | 1.76504100  | 3.94459800  | -2.94726400 |
| H | 0.34924600  | -0.04826300 | -2.99681100 | H                                     | 0.90144700  | 1.75684800  | -2.13621400 |
| H | 0.46125600  | -2.80482000 | 0.16193500  | C                                     | -1.61373200 | 0.95688600  | 1.10786500  |
| C | -5.86529700 | -0.65305100 | -0.74718100 | C                                     | -2.20101700 | -0.16779700 | 1.71536400  |
| C | -6.59146800 | 0.41341200  | -1.30781900 | C                                     | -3.52141500 | -0.12354500 | 2.15758400  |
| C | -6.46546500 | -1.39007000 | 0.29049500  | C                                     | -4.28179400 | 1.03822700  | 1.98794900  |
| C | -7.86761800 | 0.73457300  | -0.84475800 | C                                     | -3.70728000 | 2.15677300  | 1.38296500  |
| H | -6.16219400 | 0.98182200  | -2.12766200 | C                                     | -2.37945100 | 2.12011100  | 0.94562400  |
| C | -7.74282800 | -1.07138200 | 0.75087100  | H                                     | -1.62678400 | -1.08432800 | 1.82164100  |
| H | -5.91333500 | -2.19823100 | 0.75944000  | H                                     | -3.96528600 | -1.00243100 | 2.61599400  |
| C | -8.44997600 | -0.00576100 | 0.18706900  | H                                     | -5.31826200 | 1.06226400  | 2.31081000  |
| H | -8.41115000 | 1.55929900  | -1.29778500 | H                                     | -4.29193300 | 3.06206000  | 1.24401000  |



|   |             |             |             |                                       |             |             |             |
|---|-------------|-------------|-------------|---------------------------------------|-------------|-------------|-------------|
| H | -1.94899100 | 2.99644600  | 0.47189300  | C                                     | -6.66194600 | -1.46538000 | 0.58013300  |
| C | 3.74833300  | 0.56203500  | -0.72714200 | C                                     | -8.16225400 | 0.52916600  | -0.66094900 |
| C | 4.29875200  | 1.59035100  | 0.05068000  | H                                     | -6.52062200 | 0.69786900  | -2.03933100 |
| C | 4.98751200  | 2.64180300  | -0.55952900 | C                                     | -7.92207400 | -1.12946200 | 1.07582700  |
| C | 5.14338400  | 2.66888700  | -1.94673100 | H                                     | -6.07108000 | -2.22338300 | 1.08563900  |
| C | 4.60331400  | 1.64248000  | -2.72797300 | C                                     | -8.67791100 | -0.12870800 | 0.45885100  |
| C | 3.90061000  | 0.60143000  | -2.12297000 | H                                     | -8.74432600 | 1.30320000  | -1.15386200 |
| H | 4.17783100  | 1.58446600  | 1.12911700  | H                                     | -8.30954200 | -1.64290800 | 1.95175200  |
| H | 5.39751700  | 3.44133900  | 0.05120400  | H                                     | -9.65791700 | 0.13552700  | 0.84620500  |
| H | 5.67481700  | 3.49030600  | -2.41908100 |                                       |             |             |             |
| H | 4.71365000  | 1.66288000  | -3.80864600 | <b>IM2b</b>                           |             |             |             |
| H | 3.44033000  | -0.17123900 | -2.73321800 | SCF Energy = -2579.684376 a.u.        |             |             |             |
| C | 3.92120000  | -2.19712400 | 0.19164600  | Gibbs Free Energy = -2579.089389 a.u. |             |             |             |
| C | 5.30853000  | -2.01461200 | 0.30139700  |                                       |             |             |             |
| C | 6.14794300  | -3.11623700 | 0.47939000  | Cu                                    | 0.86718700  | -1.10756700 | -1.04346800 |
| C | 5.61047000  | -4.40437500 | 0.55107600  | C                                     | 1.15416500  | 0.45490000  | 1.92668700  |
| C | 4.22998300  | -4.59250300 | 0.43880700  | C                                     | 0.77716000  | 0.87476200  | 3.20997600  |
| C | 3.38871400  | -3.49465400 | 0.25331100  | C                                     | 1.68392700  | 0.81600900  | 4.26919900  |
| H | 5.73172400  | -1.01607400 | 0.24639900  | C                                     | 2.97893800  | 0.33614300  | 4.05659800  |
| H | 7.22101900  | -2.96786700 | 0.56206600  | C                                     | 3.36595400  | -0.08870700 | 2.78499800  |
| H | 6.26621700  | -5.25958700 | 0.68823400  | C                                     | 2.46430700  | -0.03612600 | 1.71286000  |
| H | 3.80976300  | -5.59311300 | 0.48695800  | H                                     | -0.22993900 | 1.24192400  | 3.38258600  |
| H | 2.31507800  | -3.63667300 | 0.15279500  | H                                     | 1.37884700  | 1.14296800  | 5.25926100  |
| C | -3.91263300 | -0.13377400 | -1.51031800 | H                                     | 3.68615600  | 0.28894600  | 4.87986000  |
| C | -4.77169300 | -1.14172800 | -1.04251300 | H                                     | 4.37133200  | -0.46695200 | 2.62676600  |
| C | -4.28103100 | -2.45962900 | -1.01668300 | P                                     | 0.02165600  | 0.50549700  | 0.46482500  |
| C | -2.97709100 | -2.74592800 | -1.41120300 | P                                     | 2.88330000  | -0.60355600 | 0.00647800  |
| C | -2.11064000 | -1.73296400 | -1.84876900 | C                                     | 0.32978800  | 2.18047200  | -0.23023000 |
| C | -2.60930400 | -0.42345200 | -1.90427500 | C                                     | 0.52471900  | 3.31905800  | 0.56817100  |
| H | -4.24829300 | 0.89835900  | -1.51191700 | C                                     | 0.81414400  | 4.54988800  | -0.02152200 |
| H | -4.92934800 | -3.26806800 | -0.69036700 | C                                     | 0.92144400  | 4.65420400  | -1.41186400 |
| H | -2.61644500 | -3.77120400 | -1.36572800 | C                                     | 0.73367000  | 3.52591500  | -2.21280600 |
| C | -0.68443200 | -2.05862000 | -2.18010400 | C                                     | 0.43723800  | 2.29490000  | -1.62480700 |
| C | 0.12443800  | -1.16359600 | -2.98012600 | H                                     | 0.46384400  | 3.24234800  | 1.64987800  |
| H | -0.52506700 | -3.12242000 | -2.34358100 | H                                     | 0.96616300  | 5.42548700  | 0.60348300  |
| H | -1.95896700 | 0.38859500  | -2.21106800 | H                                     | 1.15875100  | 5.61115000  | -1.86810300 |
| H | 0.86403300  | -1.62306500 | -3.63173600 | H                                     | 0.82902700  | 3.59931700  | -3.29225900 |
| H | -0.33332300 | -0.26169300 | -3.37408700 | H                                     | 0.31099300  | 1.41060500  | -2.24440000 |
| H | -0.22208000 | -2.27156600 | -0.67430300 | C                                     | -1.64740600 | 0.57244000  | 1.22396400  |
| C | -6.12910200 | -0.81006200 | -0.54520000 | C                                     | -2.12826400 | -0.61246400 | 1.80819200  |
| C | -6.90309400 | 0.19168200  | -1.15775100 | C                                     | -3.39857100 | -0.65324600 | 2.37889100  |

|   |             |             |             |                                      |             |             |             |
|---|-------------|-------------|-------------|--------------------------------------|-------------|-------------|-------------|
| C | -4.21344700 | 0.48312000  | 2.35840300  | H                                    | -1.29432200 | -3.80085200 | -3.01877000 |
| C | -3.75197000 | 1.65637100  | 1.76070700  | H                                    | -1.72990300 | -0.47356700 | -2.35041200 |
| C | -2.47399200 | 1.70465700  | 1.19704500  | H                                    | 0.99105800  | -2.92881600 | -2.88265400 |
| H | -1.50907600 | -1.50620600 | 1.80690200  | H                                    | -0.06222800 | -1.63945400 | -3.39616800 |
| H | -3.75878900 | -1.57533800 | 2.82595700  | H                                    | -0.72783700 | -3.85068400 | -1.36959300 |
| H | -5.21044400 | 0.44622800  | 2.78541200  | C                                    | -6.01640200 | -0.58950300 | -0.51818800 |
| H | -4.38711600 | 2.53714200  | 1.72865900  | C                                    | -6.55833600 | 0.48915800  | -1.24041600 |
| H | -2.12662100 | 2.62463200  | 0.73838900  | C                                    | -6.71299400 | -1.03595500 | 0.62019900  |
| C | 3.64158700  | 0.86597500  | -0.79658900 | C                                    | -7.74387500 | 1.10337600  | -0.83524200 |
| C | 3.87692900  | 2.07548300  | -0.12782500 | H                                    | -6.05624000 | 0.83804800  | -2.13792900 |
| C | 4.36460600  | 3.18224900  | -0.82656900 | C                                    | -7.90156800 | -0.42678000 | 1.02245800  |
| C | 4.63309700  | 3.08927400  | -2.19355900 | H                                    | -6.30333900 | -1.84900100 | 1.21138700  |
| C | 4.40898600  | 1.88383600  | -2.86576400 | C                                    | -8.42244600 | 0.64924200  | 0.29848400  |
| C | 3.90688200  | 0.78155800  | -2.17494700 | H                                    | -8.14293100 | 1.93284500  | -1.41296300 |
| H | 3.66629900  | 2.16178200  | 0.93298100  | H                                    | -8.41579100 | -0.78673500 | 1.90965700  |
| H | 4.52935700  | 4.11836400  | -0.30058800 | H                                    | -9.34608300 | 1.12672600  | 0.61337300  |
| H | 5.00920300  | 3.95276300  | -2.73494600 |                                      |             |             |             |
| H | 4.61260300  | 1.80622900  | -3.93015900 | <b>IM1a'</b>                         |             |             |             |
| H | 3.71079900  | -0.14620700 | -2.70675200 | SCF Energy = -2156.732811 a.u.       |             |             |             |
| C | 4.27279700  | -1.77769900 | 0.24448000  | Gibbs Free Energy = -2156.26578 a.u. |             |             |             |
| C | 5.61893300  | -1.38351000 | 0.29671100  | Cu                                   | 0.06474900  | -1.13972900 | 1.67292500  |
| C | 6.62140300  | -2.33671500 | 0.48716400  | C                                    | 0.64683200  | -0.84809200 | -1.47720500 |
| C | 6.28946200  | -3.68697800 | 0.62967300  | C                                    | 1.31698300  | -1.26043900 | -2.63589200 |
| C | 4.95124500  | -4.08638100 | 0.57536500  | C                                    | 0.59984400  | -1.63430400 | -3.77370800 |
| C | 3.94769000  | -3.13728900 | 0.37636500  | C                                    | -0.79607200 | -1.59731300 | -3.76318300 |
| H | 5.88326100  | -0.33595500 | 0.18590300  | C                                    | -1.47539000 | -1.19592000 | -2.61152000 |
| H | 7.66147400  | -2.02468400 | 0.52477000  | C                                    | -0.76815000 | -0.82189100 | -1.46107600 |
| H | 7.07203900  | -4.42630400 | 0.77539000  | H                                    | 2.40189800  | -1.30057900 | -2.64663900 |
| H | 4.69004600  | -5.13602600 | 0.67680600  | H                                    | 1.13148000  | -1.95597600 | -4.66482500 |
| H | 2.90747800  | -3.44889000 | 0.31510500  | H                                    | -1.35720000 | -1.88692200 | -4.64716000 |
| C | -3.71206600 | -0.48227400 | -1.52775500 | H                                    | -2.56100600 | -1.18233700 | -2.60570900 |
| C | -4.74343200 | -1.22888200 | -0.93607400 | P                                    | 1.52277500  | -0.30244500 | 0.05956500  |
| C | -4.51961400 | -2.60502100 | -0.74377100 | P                                    | -1.59749500 | -0.35226800 | 0.12336600  |
| C | -3.32019300 | -3.19732000 | -1.12917200 | C                                    | 1.75484400  | 1.49579400  | -0.29427900 |
| C | -2.28919700 | -2.45413700 | -1.72776400 | C                                    | 2.25933100  | 1.95643400  | -1.52291300 |
| C | -2.51474900 | -1.08445500 | -1.91847500 | C                                    | 2.35247400  | 3.32390600  | -1.78019100 |
| H | -3.82931200 | 0.59001400  | -1.65293400 | C                                    | 1.93742600  | 4.24955800  | -0.81730600 |
| H | -5.30081300 | -3.22103800 | -0.30710300 | C                                    | 1.43167500  | 3.80190900  | 0.40374100  |
| H | -3.18180200 | -4.26576100 | -0.97403000 | C                                    | 1.34085400  | 2.43224100  | 0.66226100  |
| C | -1.01281400 | -3.15125600 | -2.16877800 | H                                    | 2.57299900  | 1.24730500  | -2.28294500 |
| C | 0.19411600  | -2.25908300 | -2.51809100 | H                                    | 2.74163800  | 3.66756700  | -2.73462300 |

|   |             |             |             |                                       |             |             |             |
|---|-------------|-------------|-------------|---------------------------------------|-------------|-------------|-------------|
| H | 2.00105100  | 5.31425400  | -1.02396300 | H                                     | -1.51867000 | -0.81354000 | 3.76984300  |
| H | 1.09236700  | 4.51383900  | 1.15032600  | H                                     | 0.09638200  | -2.73666100 | 1.64400100  |
| H | 0.92032300  | 2.08921100  | 1.59892500  | H                                     | 1.93066200  | 0.98748000  | 4.73812800  |
| C | 3.19609200  | -1.04664700 | -0.08200800 | H                                     | 2.23181100  | -0.57859400 | 3.95493800  |
| C | 3.27979400  | -2.44911100 | -0.00923200 | H                                     | 2.31401500  | 0.92232000  | 3.01733500  |
| C | 4.51938400  | -3.08492000 | -0.05133900 |                                       |             |             |             |
| C | 5.69339600  | -2.33002100 | -0.14530800 | <b>TS1a'</b>                          |             |             |             |
| C | 5.61871600  | -0.93735000 | -0.19940500 | SCF Energy = -2156.700457 a.u.        |             |             |             |
| C | 4.37700000  | -0.29558000 | -0.17071900 | Gibbs Free Energy = -2156.232745 a.u. |             |             |             |
| H | 2.37038900  | -3.03572200 | 0.08851700  |                                       |             |             |             |
| H | 4.56963900  | -4.16916000 | -0.00276600 | Cu                                    | 0.01171000  | -0.75453800 | 1.64781200  |
| H | 6.65964100  | -2.82597300 | -0.17101100 | C                                     | 0.65384400  | -0.76448800 | -1.53675300 |
| H | 6.52684700  | -0.34460600 | -0.26756900 | C                                     | 1.31405900  | -1.07746800 | -2.73219100 |
| H | 4.33539600  | 0.78756700  | -0.21842300 | C                                     | 0.58820700  | -1.40611200 | -3.87836400 |
| C | -1.89586800 | 1.45474800  | -0.04569800 | C                                     | -0.80780700 | -1.41903200 | -3.84258800 |
| C | -1.67684700 | 2.17487600  | -1.22886700 | C                                     | -1.47763700 | -1.09977400 | -2.66022300 |
| C | -1.84307200 | 3.56148100  | -1.25068500 | C                                     | -0.76007000 | -0.77147000 | -1.50222900 |
| C | -2.23993200 | 4.24141800  | -0.09732900 | H                                     | 2.39905300  | -1.08114000 | -2.76644200 |
| C | -2.46945300 | 3.53024400  | 1.08470600  | H                                     | 1.11369700  | -1.65436900 | -4.79624400 |
| C | -2.29039100 | 2.14753500  | 1.11225200  | H                                     | -1.37538700 | -1.67719000 | -4.73214200 |
| H | -1.36042000 | 1.65780000  | -2.12894000 | H                                     | -2.56325300 | -1.10992500 | -2.63789900 |
| H | -1.65697100 | 4.10999600  | -2.16981000 | P                                     | 1.54290700  | -0.30763900 | 0.02499400  |
| H | -2.36520300 | 5.32033600  | -0.11657300 | P                                     | -1.58581200 | -0.34064300 | 0.09683100  |
| H | -2.77663300 | 4.05378900  | 1.98588000  | C                                     | 1.83657500  | 1.49437100  | -0.24477700 |
| H | -2.45125000 | 1.60066100  | 2.03836900  | C                                     | 2.56138500  | 1.98891900  | -1.34178300 |
| C | -3.27085900 | -1.09917300 | -0.00816200 | C                                     | 2.67840800  | 3.36375000  | -1.54408400 |
| C | -4.37463800 | -0.44143400 | -0.57316700 | C                                     | 2.06572500  | 4.25834200  | -0.65920300 |
| C | -5.61437200 | -1.08111100 | -0.63860400 | C                                     | 1.34017200  | 3.77386300  | 0.43009900  |
| C | -5.76151400 | -2.38037700 | -0.14503100 | C                                     | 1.22851400  | 2.39685400  | 0.63815500  |
| C | -4.66682100 | -3.03929400 | 0.42186700  | H                                     | 3.03089500  | 1.30048300  | -2.03835800 |
| C | -3.42840900 | -2.40034300 | 0.49669400  | H                                     | 3.24087100  | 3.73816300  | -2.39501900 |
| H | -4.26688500 | 0.56723300  | -0.96096100 | H                                     | 2.15117900  | 5.32881000  | -0.82469700 |
| H | -6.46427300 | -0.56554700 | -1.07746000 | H                                     | 0.85166900  | 4.46249000  | 1.11336600  |
| H | -6.72710300 | -2.87568400 | -0.19746400 | H                                     | 0.64576400  | 2.00867000  | 1.46859900  |
| H | -4.77846700 | -4.04705000 | 0.81232100  | C                                     | 3.19048300  | -1.10126600 | -0.13406900 |
| H | -2.57608300 | -2.90273100 | 0.94772000  | C                                     | 3.24904000  | -2.48215200 | -0.39559700 |
| C | 1.77605000  | 0.40706100  | 3.81810200  | C                                     | 4.47438500  | -3.14666800 | -0.41593800 |
| C | 0.30461400  | 0.27999900  | 3.52004900  | C                                     | 5.65790400  | -2.44744200 | -0.15761600 |
| C | -0.43335600 | -0.82065600 | 3.83211100  | C                                     | 5.60671700  | -1.08025900 | 0.11964300  |
| H | -0.21350900 | 1.17453100  | 3.17770000  | C                                     | 4.38158000  | -0.40828000 | 0.13146600  |
| H | 0.01924300  | -1.67932900 | 4.32030800  | H                                     | 2.33358100  | -3.03520600 | -0.58847000 |

|                                       |             |             |             |   |             |             |             |
|---------------------------------------|-------------|-------------|-------------|---|-------------|-------------|-------------|
| H                                     | 4.50497400  | -4.21142000 | -0.63002700 | C | 0.65412700  | -0.24749200 | -1.71252700 |
| H                                     | 6.61187500  | -2.96690600 | -0.17006700 | C | 1.31611800  | -0.28307000 | -2.94738800 |
| H                                     | 6.52113700  | -0.53012200 | 0.32408000  | C | 0.59057600  | -0.35110900 | -4.13789300 |
| H                                     | 4.35867600  | 0.65580600  | 0.34392700  | C | -0.80558000 | -0.38767800 | -4.10551000 |
| C                                     | -2.00507400 | 1.44288500  | -0.10154800 | C | -1.47718200 | -0.35968300 | -2.88215100 |
| C                                     | -1.81750100 | 2.16025000  | -1.29118600 | C | -0.76094100 | -0.29090700 | -1.67915400 |
| C                                     | -2.06970800 | 3.53430600  | -1.33301100 | H | 2.40141000  | -0.26190300 | -2.97857200 |
| C                                     | -2.52208700 | 4.20191400  | -0.19391500 | H | 1.11533000  | -0.37942600 | -5.08867400 |
| C                                     | -2.71991200 | 3.49149300  | 0.99495000  | H | -1.37175100 | -0.44417600 | -5.03086200 |
| C                                     | -2.45365300 | 2.12420700  | 1.04321700  | H | -2.56208500 | -0.39918100 | -2.86366600 |
| H                                     | -1.45809200 | 1.65637800  | -2.18227900 | P | 1.52744200  | -0.16084200 | -0.08619400 |
| H                                     | -1.90700700 | 4.08146700  | -2.25745000 | P | -1.56777000 | -0.29115500 | -0.01517500 |
| H                                     | -2.71428800 | 5.27063800  | -0.22795100 | C | 1.68656300  | 1.64582000  | 0.20778000  |
| H                                     | -3.06760300 | 4.00555200  | 1.88680200  | C | 1.83844200  | 2.58995600  | -0.82005700 |
| H                                     | -2.57639200 | 1.58326500  | 1.97817800  | C | 1.89318400  | 3.95182300  | -0.52006700 |
| C                                     | -3.20680300 | -1.20107000 | 0.02401000  | C | 1.79125800  | 4.38335400  | 0.80567800  |
| C                                     | -4.35921400 | -0.63267100 | -0.54043400 | C | 1.63564300  | 3.45035900  | 1.83348800  |
| C                                     | -5.55605800 | -1.35195800 | -0.56351200 | C | 1.58070200  | 2.08772100  | 1.53599500  |
| C                                     | -5.61164200 | -2.64152200 | -0.02766000 | H | 1.89844500  | 2.26313900  | -1.85390500 |
| C                                     | -4.46791900 | -3.21162400 | 0.53881000  | H | 2.00648400  | 4.67667900  | -1.32150600 |
| C                                     | -3.27248300 | -2.49250000 | 0.57107600  | H | 1.82377100  | 5.44473400  | 1.03526600  |
| H                                     | -4.32328700 | 0.36887100  | -0.95855800 | H | 1.54427400  | 3.78227600  | 2.86377400  |
| H                                     | -6.44458400 | -0.90487600 | -1.00078000 | H | 1.43447400  | 1.35947500  | 2.32986500  |
| H                                     | -6.54475400 | -3.19767900 | -0.04615600 | C | 3.21963700  | -0.76401500 | -0.46260600 |
| H                                     | -4.50874700 | -4.21099500 | 0.96298600  | C | 3.41433600  | -2.15560200 | -0.42424700 |
| H                                     | -2.38250300 | -2.92394900 | 1.02384900  | C | 4.66766500  | -2.70174700 | -0.69974300 |
| C                                     | 1.56502200  | 0.59493500  | 3.92042800  | C | 5.74538100  | -1.86281200 | -0.99934200 |
| C                                     | 0.20986900  | -0.00407100 | 3.59473100  | C | 5.56340700  | -0.47811500 | -1.02444600 |
| C                                     | 0.04738400  | -1.43395000 | 3.65003900  | C | 4.30648700  | 0.07166100  | -0.75978200 |
| H                                     | -0.65934600 | 0.58771500  | 3.87900300  | H | 2.58157000  | -2.80804400 | -0.17210200 |
| H                                     | 0.89047300  | -2.02803500 | 4.00106300  | H | 4.80616700  | -3.77881500 | -0.67030700 |
| H                                     | -0.90890900 | -1.83123300 | 3.98624500  | H | 6.72404300  | -2.28705800 | -1.20524300 |
| H                                     | 0.02082100  | -2.25063000 | 2.30177800  | H | 6.39967000  | 0.17716500  | -1.25212200 |
| H                                     | 1.77814400  | 0.62218800  | 5.00369000  | H | 4.17548900  | 1.14892300  | -0.78395900 |
| H                                     | 2.36946300  | 0.01250700  | 3.45297500  | C | -1.92953200 | 1.47627600  | 0.32998800  |
| H                                     | 1.66565700  | 1.62263700  | 3.55240700  | C | -1.84892000 | 2.48778500  | -0.63775000 |
|                                       |             |             |             | C | -2.08596200 | 3.81816700  | -0.28434000 |
| <b>IM2a'</b>                          |             |             |             | C | -2.41298700 | 4.14886700  | 1.03245100  |
| SCF Energy = -2156.749357 a.u.        |             |             |             | C | -2.49823100 | 3.14521800  | 2.00180300  |
| Gibbs Free Energy = -2156.279796 a.u. |             |             |             | C | -2.24910700 | 1.81751100  | 1.65564300  |
| Cu                                    | -0.00092400 | -1.10904100 | 1.46971400  | H | -1.59084400 | 2.24202300  | -1.66292200 |

|                                       |             |             |             |   |             |             |             |
|---------------------------------------|-------------|-------------|-------------|---|-------------|-------------|-------------|
| H                                     | -2.01138200 | 4.59572500  | -1.03945700 | P | 1.61532600  | -0.35177700 | -0.09754100 |
| H                                     | -2.59421700 | 5.18496900  | 1.30429100  | C | -1.78538800 | 1.52957400  | 0.23525800  |
| H                                     | -2.74543500 | 3.39780300  | 3.02912200  | C | -1.96599700 | 2.10088600  | 1.50606600  |
| H                                     | -2.29100300 | 1.04113100  | 2.41563100  | C | -2.12976000 | 3.47954300  | 1.64575600  |
| C                                     | -3.20647200 | -1.06182200 | -0.31666100 | C | -2.11105400 | 4.30735200  | 0.51968700  |
| C                                     | -4.35141100 | -0.33438100 | -0.67568700 | C | -1.93568800 | 3.74963700  | -0.74827900 |
| C                                     | -5.56218500 | -0.99564400 | -0.89389200 | C | -1.77416500 | 2.36994400  | -0.88843100 |
| C                                     | -5.63867900 | -2.38453800 | -0.76009400 | H | -1.96721500 | 1.47182700  | 2.39052900  |
| C                                     | -4.50215200 | -3.11464000 | -0.40050900 | H | -2.26492700 | 3.90817500  | 2.63502000  |
| C                                     | -3.29374000 | -2.45592700 | -0.17181300 | H | -2.22866000 | 5.38153900  | 0.63138800  |
| H                                     | -4.29957900 | 0.74516200  | -0.78244000 | H | -1.91607200 | 4.38697400  | -1.62778300 |
| H                                     | -6.44529500 | -0.42531400 | -1.16845800 | H | -1.62968000 | 1.94572800  | -1.87653600 |
| H                                     | -6.58220000 | -2.89601100 | -0.92879000 | C | -3.17088300 | -1.03705200 | 0.15021700  |
| H                                     | -4.55918400 | -4.19362300 | -0.28730600 | C | -3.27636100 | -2.40671100 | -0.15053400 |
| H                                     | -2.41350400 | -3.02079700 | 0.12632400  | C | -4.50553400 | -3.05809400 | -0.05306700 |
| C                                     | 1.76728500  | -1.88906100 | 3.65878000  | C | -5.64808100 | -2.34776900 | 0.32851000  |
| C                                     | 0.33764400  | -2.12731200 | 3.14487600  | C | -5.55340000 | -0.98453200 | 0.61588100  |
| C                                     | 0.10399800  | -3.63288500 | 2.93423300  | C | -4.32117400 | -0.33026200 | 0.53097200  |
| H                                     | -0.35154700 | -1.80762600 | 3.94718500  | H | -2.39175000 | -2.95386500 | -0.46616700 |
| H                                     | 0.33539500  | -4.23916000 | 3.83195600  | H | -4.57278900 | -4.11777800 | -0.28369400 |
| H                                     | -0.93604000 | -3.85111300 | 2.65935300  | H | -6.60703800 | -2.85391000 | 0.39659700  |
| H                                     | 0.73378700  | -4.02965300 | 2.12489100  | H | -6.43823000 | -0.42629300 | 0.90965500  |
| H                                     | 2.00473700  | -2.46341500 | 4.57580300  | H | -4.26136400 | 0.72858500  | 0.76194900  |
| H                                     | 2.51551200  | -2.17747800 | 2.90690900  | C | 1.88846100  | 1.46627700  | -0.03161500 |
| H                                     | 1.94900700  | -0.83074300 | 3.88842100  | C | 1.49433700  | 2.26179300  | 1.05350300  |
|                                       |             |             |             | C | 1.63666200  | 3.65046300  | 0.99978300  |
|                                       |             |             |             | C | 2.18576300  | 4.25813300  | -0.13034100 |
|                                       |             |             |             | C | 2.59418800  | 3.47133800  | -1.21217600 |
|                                       |             |             |             | C | 2.43942200  | 2.08654700  | -1.16709600 |
|                                       |             |             |             | H | 1.06234700  | 1.80261100  | 1.93591200  |
|                                       |             |             |             | H | 1.31339900  | 4.25514800  | 1.84224000  |
|                                       |             |             |             | H | 2.29353600  | 5.33839200  | -0.17076200 |
|                                       |             |             |             | H | 3.02482200  | 3.93729600  | -2.09423700 |
|                                       |             |             |             | H | 2.74488300  | 1.48381700  | -2.01792700 |
|                                       |             |             |             | C | 3.29875300  | -1.06778300 | 0.05751100  |
|                                       |             |             |             | C | 4.37900900  | -0.38190000 | 0.63488500  |
|                                       |             |             |             | C | 5.63069700  | -0.99410300 | 0.72414000  |
|                                       |             |             |             | C | 5.81297500  | -2.29316500 | 0.24130600  |
|                                       |             |             |             | C | 4.74174900  | -2.97987800 | -0.33679100 |
|                                       |             |             |             | C | 3.49067600  | -2.36872700 | -0.43417900 |
|                                       |             |             |             | H | 4.24358500  | 0.62774800  | 1.01125400  |
| <b>IM1b'</b>                          |             |             |             |   |             |             |             |
| SCF Energy = -2156.734686 a.u.        |             |             |             |   |             |             |             |
| Gibbs Free Energy = -2156.267277 a.u. |             |             |             |   |             |             |             |
| Cu                                    | 0.09535900  | -1.18413600 | -1.63458100 | H | 1.06234700  | 1.80261100  | 1.93591200  |
| C                                     | -0.62988800 | -0.76245000 | 1.52213900  | H | 1.31339900  | 4.25514800  | 1.84224000  |
| C                                     | -1.29995600 | -1.13723100 | 2.69411500  | H | 2.29353600  | 5.33839200  | -0.17076200 |
| C                                     | -0.58345400 | -1.47891400 | 3.84273200  | H | 3.02482200  | 3.93729600  | -2.09423700 |
| C                                     | 0.81250900  | -1.44822400 | 3.83012600  | H | 2.74488300  | 1.48381700  | -2.01792700 |
| C                                     | 1.49296800  | -1.08728800 | 2.66575500  | C | 3.29875300  | -1.06778300 | 0.05751100  |
| C                                     | 0.78546300  | -0.74885600 | 1.50492400  | C | 4.37900900  | -0.38190000 | 0.63488500  |
| H                                     | -2.38541500 | -1.16570200 | 2.70799800  | C | 5.63069700  | -0.99410300 | 0.72414000  |
| H                                     | -1.11567400 | -1.76940000 | 4.74415800  | C | 5.81297500  | -2.29316500 | 0.24130600  |
| H                                     | 1.37322300  | -1.71275400 | 4.72217700  | C | 4.74174900  | -2.97987800 | -0.33679100 |
| H                                     | 2.57861300  | -1.08071800 | 2.65896700  | C | 3.49067600  | -2.36872700 | -0.43417900 |
| P                                     | -1.50632000 | -0.27571000 | -0.03296100 | H | 4.24358500  | 0.62774800  | 1.01125400  |

|   |             |             |             |   |             |             |             |
|---|-------------|-------------|-------------|---|-------------|-------------|-------------|
| H | 6.46268500  | -0.45733300 | 1.17160800  | H | -0.79940800 | 4.19626300  | -2.19480100 |
| H | 6.78833800  | -2.76667800 | 0.31097300  | H | -0.76532800 | 1.71481000  | -2.01610700 |
| H | 4.88131900  | -3.98740300 | -0.71862300 | C | -3.22494300 | -0.79345700 | 0.34425300  |
| H | 2.65562800  | -2.89214500 | -0.89361700 | C | -3.35600700 | -2.14004300 | 0.73049000  |
| C | -0.47024700 | -0.77536300 | -3.79784200 | C | -4.61778500 | -2.70573600 | 0.90474600  |
| C | 0.38800000  | 0.20239700  | -3.39290700 | C | -5.76771900 | -1.94213700 | 0.67749400  |
| H | -0.06096800 | -1.66241100 | -4.27759600 | C | -5.64594500 | -0.60978000 | 0.27977500  |
| H | 1.45723600  | 0.10707100  | -3.56015600 | C | -4.38244900 | -0.03507900 | 0.11515900  |
| H | 0.03492700  | 1.16699700  | -3.04127900 | H | -2.46718200 | -2.74323000 | 0.89627100  |
| H | -0.05050900 | -2.77130100 | -1.61853400 | H | -4.70387500 | -3.74448800 | 1.21131900  |
| C | -1.96861200 | -0.63763600 | -3.83594100 | H | -6.75090700 | -2.38571000 | 0.80680500  |
| H | -2.45782900 | -1.50955800 | -3.39059700 | H | -6.53445400 | -0.01115200 | 0.09871000  |
| H | -2.30521100 | 0.25487000  | -3.30071300 | H | -4.30364800 | 1.00352600  | -0.18939100 |
| H | -2.31364900 | -0.56498900 | -4.87624200 | C | 2.00414100  | 1.41795600  | -0.24765300 |

**TS1b'**

SCF Energy = -2156.705825 a.u.

Gibbs Free Energy = -2156.238003 a.u.

|    |             |             |             |   |             |             |             |
|----|-------------|-------------|-------------|---|-------------|-------------|-------------|
| Cu | -0.01882600 | -1.07132500 | -1.45848100 | C | 1.88501100  | 2.36751400  | 0.77650500  |
| C  | -0.65845300 | -0.35338600 | 1.64411900  | C | 2.13828800  | 3.71708200  | 0.51770400  |
| C  | -1.32485400 | -0.42044600 | 2.87433100  | C | 2.52621300  | 4.12746600  | -0.75895300 |
| C  | -0.60711300 | -0.56320500 | 4.06331900  | C | 2.65475600  | 3.18430100  | -1.78369900 |
| C  | 0.78696800  | -0.63546300 | 4.03406300  | C | 2.38410500  | 1.84012300  | -1.53256400 |
| C  | 1.46382900  | -0.56576600 | 2.81479500  | H | 1.57711100  | 2.06215000  | 1.77114900  |
| C  | 0.75442400  | -0.42768900 | 1.61450400  | H | 2.02791400  | 4.44663500  | 1.31513300  |
| H  | -2.40915300 | -0.37598800 | 2.90474400  | H | 2.71935500  | 5.17778900  | -0.95848500 |
| H  | -1.13748800 | -0.62189600 | 5.00961300  | H | 2.94829300  | 3.49859500  | -2.78145300 |
| H  | 1.34791800  | -0.75036300 | 4.95720200  | H | 2.44197700  | 1.11474200  | -2.33982600 |
| H  | 2.54774100  | -0.62694000 | 2.79868000  | C | 3.19545200  | -1.19837300 | 0.21202500  |
| P  | -1.53402800 | -0.15599500 | 0.02220700  | C | 4.34924300  | -0.52936500 | 0.64928000  |
| P  | 1.58078600  | -0.36245200 | -0.04060700 | C | 5.54351200  | -1.23181700 | 0.82370200  |
| C  | -1.70047900 | 1.67795200  | -0.08049900 | C | 5.59515300  | -2.60443000 | 0.56611900  |
| C  | -2.22481700 | 2.45304100  | 0.96724300  | C | 4.45041500  | -3.27553600 | 0.12697300  |
| C  | -2.24307800 | 3.84410500  | 0.87067500  | C | 3.25743900  | -2.57516300 | -0.05637000 |
| C  | -1.73204100 | 4.47498200  | -0.26894000 | H | 4.31670600  | 0.53729100  | 0.85062500  |
| C  | -1.20923500 | 3.71120700  | -1.31374200 | H | 6.43288900  | -0.70656200 | 1.16081200  |
| C  | -1.19500800 | 2.31739000  | -1.22045500 | H | 6.52613800  | -3.14794400 | 0.70110400  |
| H  | -2.61059800 | 1.97057900  | 1.86048400  | H | 4.48845400  | -4.34097200 | -0.08221400 |
| H  | -2.64779100 | 4.43692600  | 1.68640500  | H | 2.36866000  | -3.09079400 | -0.41291400 |
| H  | -1.73690100 | 5.55941400  | -0.33643600 | C | -0.43466300 | -2.19941800 | -3.21992900 |
|    |             |             |             | C | -0.19056600 | -0.81457900 | -3.52478400 |
|    |             |             |             | H | 0.34772400  | -2.89383400 | -3.52282800 |
|    |             |             |             | H | 0.74327100  | -0.54531400 | -4.01228200 |
|    |             |             |             | H | -1.04704300 | -0.18779100 | -3.76596800 |
|    |             |             |             | H | -0.26202200 | -2.66361000 | -1.70034600 |

|                                       |             |             |             |                                       |             |             |             |
|---------------------------------------|-------------|-------------|-------------|---------------------------------------|-------------|-------------|-------------|
| C                                     | -1.84143600 | -2.74672100 | -3.39796200 | H                                     | -6.23162700 | 0.27329400  | 1.60558700  |
| H                                     | -1.96154500 | -3.73634600 | -2.94547600 | H                                     | -4.00877100 | 1.23399400  | 1.10866900  |
| H                                     | -2.57326400 | -2.07336600 | -2.94027800 | C                                     | 2.00335400  | 1.34555900  | -0.44253200 |
| H                                     | -2.07310700 | -2.82048000 | -4.46864800 | C                                     | 1.93818000  | 2.36692300  | 0.51594000  |
| <b>IM2b'</b>                          |             |             |             | C                                     | 2.15263200  | 3.69567700  | 0.14249300  |
| SCF Energy = -2156.754358 a.u.        |             |             |             | C                                     | 2.44424000  | 4.01537800  | -1.18532200 |
| Gibbs Free Energy = -2156.285528 a.u. |             |             |             | C                                     | 2.51791300  | 3.00161900  | -2.14514100 |
| Cu                                    | -0.11859100 | -1.14859800 | -1.45226800 | C                                     | 2.28949300  | 1.67560700  | -1.77872200 |
| C                                     | -0.48461900 | -0.27675300 | 1.74236700  | H                                     | 1.70496600  | 2.13047300  | 1.54923600  |
| C                                     | -1.08312700 | -0.31509500 | 3.00875800  | H                                     | 2.08602400  | 4.48078900  | 0.89039700  |
| C                                     | -0.30219900 | -0.46461800 | 4.15599500  | H                                     | 2.60650500  | 5.05036700  | -1.47289300 |
| C                                     | 1.08566800  | -0.58031700 | 4.04640600  | H                                     | 2.73877100  | 3.24493200  | -3.18070100 |
| C                                     | 1.69375200  | -0.55242000 | 2.79005700  | H                                     | 2.32155400  | 0.89226100  | -2.53217700 |
| C                                     | 0.92189800  | -0.40355300 | 1.62937900  | C                                     | 3.27944600  | -1.20471700 | 0.12930600  |
| H                                     | -2.16250100 | -0.23423000 | 3.09828100  | C                                     | 4.44404800  | -0.49020600 | 0.45102300  |
| H                                     | -0.77714600 | -0.49444500 | 5.13250800  | C                                     | 5.66057900  | -1.16017100 | 0.59650000  |
| H                                     | 1.69512100  | -0.69925700 | 4.93774700  | C                                     | 5.72416500  | -2.54592400 | 0.42624800  |
| H                                     | 2.77193900  | -0.65454600 | 2.71402500  | C                                     | 4.56886100  | -3.26310500 | 0.10304800  |
| P                                     | -1.43066000 | -0.07832200 | 0.16834400  | C                                     | 3.35342100  | -2.59516100 | -0.05223900 |
| P                                     | 1.63389400  | -0.41697700 | -0.07732800 | H                                     | 4.40199400  | 0.58669500  | 0.58576000  |
| C                                     | -1.54390600 | 1.74434700  | -0.03045300 | H                                     | 6.55809400  | -0.59961900 | 0.84323000  |
| C                                     | -1.69452800 | 2.63302500  | 1.04617000  | H                                     | 6.67227300  | -3.06434000 | 0.53869900  |
| C                                     | -1.71085500 | 4.01050100  | 0.82313200  | H                                     | 4.61589200  | -4.33919400 | -0.03858000 |
| C                                     | -1.56773300 | 4.51323700  | -0.47332400 | H                                     | 2.45763600  | -3.15017000 | -0.32130200 |
| C                                     | -1.41057800 | 3.63592300  | -1.54880900 | C                                     | -1.87450000 | -2.79173900 | -3.23137200 |
| C                                     | -1.39777100 | 2.25773100  | -1.32867800 | C                                     | -0.43399700 | -2.26781600 | -3.06120200 |
| H                                     | -1.78232500 | 2.25136600  | 2.05896600  | H                                     | -1.96490000 | -3.46715100 | -4.10169700 |
| H                                     | -1.82539000 | 4.69153900  | 1.66185300  | H                                     | 0.25517500  | -3.13148300 | -3.06117100 |
| H                                     | -1.56932300 | 5.58622400  | -0.64314400 | H                                     | -0.16319700 | -1.70605100 | -3.97518600 |
| H                                     | -1.28424300 | 4.02261000  | -2.55585400 | H                                     | -2.15430800 | -3.39845500 | -2.35714100 |
| H                                     | -1.25127200 | 1.57328000  | -2.16027500 | C                                     | -2.91096600 | -1.67556000 | -3.39300400 |
| C                                     | -3.11873400 | -0.66522800 | 0.58261500  | H                                     | -3.92744300 | -2.06865400 | -3.52155800 |
| C                                     | -3.35065000 | -2.04371600 | 0.43517500  | H                                     | -2.90970100 | -1.01844800 | -2.51577700 |
| C                                     | -4.60289700 | -2.58441200 | 0.72488400  | H                                     | -2.68084900 | -1.05413800 | -4.26874800 |
| C                                     | -5.64270700 | -1.75101300 | 1.14836400  | <b>TS2</b>                            |             |             |             |
| C                                     | -5.42408600 | -0.37789200 | 1.28248200  | SCF Energy = -3634.366404 a.u.        |             |             |             |
| C                                     | -4.16745200 | 0.16551900  | 1.00307100  | Gibbs Free Energy = -3633.590068 a.u. |             |             |             |
| H                                     | -2.54819200 | -2.68738100 | 0.08218600  | C                                     | 0.87263400  | 0.26254900  | 2.13199900  |
| H                                     | -4.77087500 | -3.65137600 | 0.60860500  | C                                     | 0.71978000  | 0.39307000  | 3.51906400  |
| H                                     | -6.62134000 | -2.16984200 | 1.36531500  |                                       |             |             |             |

|   |             |             |             |    |             |             |             |
|---|-------------|-------------|-------------|----|-------------|-------------|-------------|
| C | 1.83658100  | 0.46135400  | 4.35330000  | H  | 1.00666200  | 3.80593000  | -3.18719600 |
| C | 3.12078400  | 0.39843300  | 3.80813100  | H  | 1.07524500  | 1.43920900  | -2.43831600 |
| C | 3.28862500  | 0.27394200  | 2.42792700  | C  | 4.00462800  | -0.65992600 | -0.50978600 |
| C | 2.17649500  | 0.21067200  | 1.57796300  | C  | 5.14517900  | 0.07740100  | -0.85857500 |
| H | -0.27671300 | 0.43480700  | 3.94841800  | C  | 6.37030300  | -0.57121400 | -1.03658400 |
| H | 1.70271600  | 0.55876300  | 5.42677800  | C  | 6.46721400  | -1.95359200 | -0.86364800 |
| H | 3.99192700  | 0.44355800  | 4.45535600  | C  | 5.33162700  | -2.69430600 | -0.52104200 |
| H | 4.28961000  | 0.21916200  | 2.01080700  | C  | 4.10494900  | -2.05380800 | -0.35270800 |
| P | -0.56885400 | 0.11490300  | 0.98956100  | H  | 5.08310500  | 1.15216100  | -0.99514400 |
| P | 2.34307800  | 0.07096300  | -0.26092200 | H  | 7.24892100  | 0.00710300  | -1.30847500 |
| C | -0.98087100 | 1.84569600  | 0.53048700  | H  | 7.42150200  | -2.45385300 | -1.00226200 |
| C | -0.32683000 | 2.96086500  | 1.07230300  | H  | 5.39845100  | -3.77133000 | -0.39527700 |
| C | -0.63180200 | 4.24416900  | 0.61220500  | H  | 3.21631700  | -2.63364100 | -0.11569900 |
| C | -1.60014600 | 4.42609500  | -0.37754200 | C  | -2.61795500 | -2.75438300 | -0.94841600 |
| C | -2.26357800 | 3.31816900  | -0.91357800 | C  | -2.77026300 | -1.57933300 | -1.74735000 |
| C | -1.94854600 | 2.03403900  | -0.47163600 | C  | -1.66123600 | -1.23687900 | -2.54597400 |
| H | 0.42965000  | 2.83247600  | 1.83936300  | C  | -1.45421800 | -3.47882000 | -0.88780800 |
| H | -0.10857100 | 5.10066700  | 1.02750700  | H  | -3.46971200 | -3.10380700 | -0.36954900 |
| H | -1.83450800 | 5.42595300  | -0.73203500 | H  | -1.71926000 | -0.37484000 | -3.20602300 |
| H | -3.02139400 | 3.44755100  | -1.68111300 | C  | 1.20495900  | -4.90898300 | -0.57599200 |
| H | -2.45701800 | 1.17803900  | -0.90212800 | H  | -1.42492100 | -4.38231200 | -0.28542000 |
| C | -1.96295400 | -0.45213000 | 2.03277300  | H  | 0.71280200  | -5.83956800 | -0.90956900 |
| C | -2.05433300 | -1.82860300 | 2.29983500  | H  | 2.27486600  | -5.13442800 | -0.50025300 |
| C | -3.12058500 | -2.33095500 | 3.04516100  | H  | 0.84346700  | -4.73074900 | 0.44852900  |
| C | -4.11353600 | -1.46698500 | 3.51805500  | C  | -3.96599800 | -0.73152300 | -1.66237900 |
| C | -4.03092300 | -0.09828300 | 3.25082600  | C  | -4.37477800 | 0.10182800  | -2.73065100 |
| C | -2.95984200 | 0.40996100  | 2.51270800  | C  | -4.72998200 | -0.66523900 | -0.47245500 |
| H | -1.30481500 | -2.50623800 | 1.90191100  | C  | -5.46742300 | 0.95878200  | -2.60981300 |
| H | -3.18450800 | -3.39705100 | 3.24375000  | H  | -3.83556400 | 0.06442400  | -3.67302500 |
| H | -4.95054600 | -1.86070100 | 4.08772300  | C  | -5.82898900 | 0.18396500  | -0.35925400 |
| H | -4.80154100 | 0.57619000  | 3.61333400  | H  | -4.42801500 | -1.25173000 | 0.38949200  |
| H | -2.90934800 | 1.47292600  | 2.30029800  | C  | -6.20790000 | 1.00846800  | -1.42344900 |
| C | 2.42199100  | 1.82424100  | -0.80005700 | H  | -5.75117600 | 1.58315000  | -3.45385300 |
| C | 3.14034500  | 2.80682100  | -0.09982400 | H  | -6.37925000 | 0.21731800  | 0.57807400  |
| C | 3.10115900  | 4.13633600  | -0.52084900 | H  | -7.05947800 | 1.67654600  | -1.33086900 |
| C | 2.33672400  | 4.49764700  | -1.63442200 | Cu | 0.38626000  | -0.92058300 | -0.84438500 |
| C | 1.61404800  | 3.52671400  | -2.33135100 | C  | -0.25365500 | -3.09742200 | -1.62696000 |
| C | 1.65730500  | 2.19480200  | -1.91635000 | C  | -0.44764000 | -1.94266000 | -2.51927900 |
| H | 3.71535500  | 2.53844400  | 0.78144700  | H  | 0.29925300  | -1.74207800 | -3.28666500 |
| H | 3.65740100  | 4.89209500  | 0.02650400  | C  | 0.96674700  | -3.73515900 | -1.48786900 |
| H | 2.29725300  | 5.53589800  | -1.95141100 | H  | 1.78837700  | -3.40603900 | -2.12023500 |



**IM3**

SCF Energy = -3634.432335 a.u.

Gibbs Free Energy = -3633.654731 a.u.

|    |             |             |             |   |             |             |             |
|----|-------------|-------------|-------------|---|-------------|-------------|-------------|
| Cu | 0.26391700  | -0.87224600 | -1.57038500 | C | 1.17520700  | -0.95923000 | 4.07893700  |
| C  | -2.11009100 | -2.73665300 | 0.90920700  | C | 2.48979400  | -0.48857100 | 4.04490300  |
| C  | -3.20702100 | -3.51480200 | 1.31749700  | C | 3.26283900  | -0.66704800 | 2.89421300  |
| C  | -3.06281800 | -4.86457400 | 1.63320700  | C | 2.71685800  | -1.30545000 | 1.78103300  |
| C  | -1.80873600 | -5.46975900 | 1.53511900  | H | -0.39842700 | -1.94563900 | 3.00708800  |
| C  | -0.70952300 | -4.72073400 | 1.12044100  | H | 0.56565900  | -0.82174600 | 4.96763400  |
| C  | -0.84410500 | -3.35845800 | 0.80505300  | H | 2.90890200  | 0.02143300  | 4.90774000  |
| H  | -4.18904700 | -3.05707600 | 1.38234900  | H | 4.27340300  | -0.27352700 | 2.83439900  |
| H  | -3.92756300 | -5.44171600 | 1.94828200  | H | 3.32105000  | -1.41872600 | 0.88707700  |
| H  | -1.68536800 | -6.52231500 | 1.77326500  | C | 1.80090900  | -3.65788100 | -0.41022900 |
| H  | 0.25821400  | -5.20359900 | 1.03451400  | C | 2.78448800  | -4.29610600 | 0.36077500  |
| P  | -2.32190700 | -0.94570700 | 0.45761100  | C | 3.64266000  | -5.22561000 | -0.23039800 |
| P  | 0.63735500  | -2.40882900 | 0.25781000  | C | 3.52319200  | -5.52828100 | -1.58909800 |
| C  | -2.60316800 | -0.09346900 | 2.06799600  | C | 2.54054200  | -4.90092800 | -2.36006200 |
| C  | -2.89296500 | -0.72326400 | 3.28817200  | C | 1.68397100  | -3.96696300 | -1.77726900 |
| C  | -3.05659500 | 0.03069300  | 4.45299800  | H | 2.88627300  | -4.06638800 | 1.41645800  |
| C  | -2.95051100 | 1.42325800  | 4.41107200  | H | 4.40395500  | -5.71292800 | 0.37212200  |
| C  | -2.67061200 | 2.06111600  | 3.19956400  | H | 4.19480800  | -6.24971900 | -2.04584200 |
| C  | -2.48481400 | 1.30781000  | 2.03986700  | H | 2.44408000  | -5.13343300 | -3.41683300 |
| H  | -2.98602600 | -1.80340600 | 3.33591700  | H | 0.91632100  | -3.47645100 | -2.37097200 |
| H  | -3.27204900 | -0.47149000 | 5.39240400  | C | -3.38230900 | 1.80804300  | -2.25568700 |
| H  | -3.08168300 | 2.00708500  | 5.31795300  | C | -3.08768800 | 2.95207000  | -1.49159500 |
| H  | -2.58508800 | 3.14345300  | 3.15780200  | C | -1.73175200 | 3.29910800  | -1.32388400 |
| H  | -2.24310900 | 1.80880500  | 1.10625700  | C | -0.72324500 | 2.52084200  | -1.87139700 |
| C  | -4.01181100 | -1.00707900 | -0.28253000 | C | -1.01495800 | 1.35464900  | -2.61052800 |
| C  | -4.11721300 | -1.56519900 | -1.56995000 | C | -2.37068800 | 1.02688800  | -2.80352000 |
| C  | -5.35101700 | -1.61598900 | -2.21720800 | H | -4.41657900 | 1.52294300  | -2.42087700 |
| C  | -6.49489500 | -1.10141600 | -1.59625800 | H | -1.46941200 | 4.16761100  | -0.72721900 |
| C  | -6.39708600 | -0.54684600 | -0.31870300 | H | 0.31501400  | 2.79320700  | -1.70614400 |
| C  | -5.16238400 | -0.50135000 | 0.33804000  | C | 0.09007900  | 0.51868200  | -3.10959700 |
| H  | -3.22118400 | -1.93862000 | -2.05870500 | C | -0.08996800 | -0.32999100 | -4.34796000 |
| H  | -5.41951800 | -2.04893000 | -3.21172100 | H | 1.02390400  | 1.07387500  | -3.13939800 |
| H  | -7.45423900 | -1.13382200 | -2.10521100 | H | -2.63396800 | 0.13882700  | -3.36549600 |
| H  | -7.28084500 | -0.14734400 | 0.17182500  | H | -0.23552100 | 0.33172700  | -5.21485900 |
| H  | -5.10010300 | -0.06466700 | 1.32974100  | H | 0.80686600  | -0.92918100 | -4.53023500 |
| C  | 1.39027300  | -1.77115400 | 1.80027200  | C | -4.15982100 | 3.75485000  | -0.85620700 |
| C  | 0.62676500  | -1.59729800 | 2.96543100  | C | -4.04647500 | 5.15185200  | -0.73136700 |
|    |             |             |             | C | -5.31079800 | 3.13182400  | -0.34026500 |
|    |             |             |             | C | -5.04832400 | 5.89809500  | -0.11088700 |
|    |             |             |             | H | -3.17859500 | 5.65910400  | -1.14262600 |
|    |             |             |             | C | -6.31117200 | 3.87882100  | 0.28074700  |

|                                      |             |             |             |   |             |             |             |
|--------------------------------------|-------------|-------------|-------------|---|-------------|-------------|-------------|
| H                                    | -5.40827000 | 2.05363500  | -0.40289600 | C | 1.83658100  | 0.46135400  | 4.35330000  |
| C                                    | -6.18518500 | 5.26542500  | 0.39961100  | C | 3.12078400  | 0.39843300  | 3.80813100  |
| H                                    | -4.94383300 | 6.97685400  | -0.03240500 | C | 3.28862500  | 0.27394200  | 2.42792700  |
| H                                    | -7.18631400 | 3.37406400  | 0.68119600  | C | 2.17649500  | 0.21067200  | 1.57796300  |
| H                                    | -6.96409400 | 5.84717300  | 0.88450800  | H | -0.27671300 | 0.43480700  | 3.94841800  |
| H                                    | -0.93855200 | -1.00764100 | -4.27012900 | H | 1.70271600  | 0.55876300  | 5.42677800  |
| C                                    | 1.68236100  | 1.06889100  | 0.05464500  | H | 3.99192700  | 0.44355800  | 4.45535600  |
| C                                    | 2.81547600  | 1.68997800  | 0.56976100  | H | 4.28961000  | 0.21916200  | 2.01080700  |
| C                                    | 4.07364600  | 1.45822800  | 0.02416800  | P | -0.56885400 | 0.11490300  | 0.98956100  |
| C                                    | 4.14773700  | 0.58770400  | -1.06007300 | P | 2.34307800  | 0.07096300  | -0.26092200 |
| C                                    | 3.00435100  | -0.02042400 | -1.56576500 | C | -0.98087100 | 1.84569600  | 0.53048700  |
| C                                    | 1.74792900  | 0.18412900  | -1.01203500 | C | -0.32683000 | 2.96086500  | 1.07230300  |
| O                                    | 5.80328100  | 1.32967600  | 1.64079900  | C | -0.63180200 | 4.24416900  | 0.61220500  |
| F                                    | 2.69912600  | 2.50358600  | 1.63999300  | C | -1.60014600 | 4.42609500  | -0.37754200 |
| F                                    | 0.50098600  | 1.29863800  | 0.67590100  | C | -2.26357800 | 3.31816900  | -0.91357800 |
| F                                    | 3.14327800  | -0.86260900 | -2.62425200 | C | -1.94854600 | 2.03403900  | -0.47163600 |
| F                                    | 5.34866300  | 0.33205300  | -1.62814000 | H | 0.42965000  | 2.83247600  | 1.83936300  |
| F                                    | -0.97400600 | -2.05513500 | -2.28914300 | H | -0.10857100 | 5.10066700  | 1.02750700  |
| C                                    | 5.32074400  | 1.97619500  | 0.70658400  | H | -1.83450800 | 5.42595300  | -0.73203500 |
| N                                    | 5.84737900  | 3.13260400  | 0.24145200  | H | -3.02139400 | 3.44755100  | -1.68111300 |
| C                                    | 7.06139500  | 3.65448400  | 0.88395000  | H | -2.45701800 | 1.17803900  | -0.90212800 |
| C                                    | 5.26433900  | 3.92120800  | -0.85174700 | C | -1.96295400 | -0.45213000 | 2.03277300  |
| H                                    | 5.38122300  | 4.97783200  | -0.58912400 | C | -2.05433300 | -1.82860300 | 2.29983500  |
| H                                    | 4.19135200  | 3.72468800  | -0.89740300 | C | -3.12058500 | -2.33095500 | 3.04516100  |
| H                                    | 7.67085800  | 2.80391700  | 1.19601500  | C | -4.11353600 | -1.46698500 | 3.51805500  |
| H                                    | 7.62242900  | 4.21139600  | 0.12806400  | C | -4.03092300 | -0.09828300 | 3.25082600  |
| C                                    | 5.91794600  | 3.62697600  | -2.20245600 | C | -2.95984200 | 0.40996100  | 2.51270800  |
| C                                    | 6.73624900  | 4.54366800  | 2.08433900  | H | -1.30481500 | -2.50623800 | 1.90191100  |
| H                                    | 6.20030400  | 3.97039600  | 2.84653000  | H | -3.18450800 | -3.39705100 | 3.24375000  |
| H                                    | 7.65776200  | 4.93373700  | 2.52982500  | H | -4.95054600 | -1.86070100 | 4.08772300  |
| H                                    | 6.11324000  | 5.39528400  | 1.79020100  | H | -4.80154100 | 0.57619000  | 3.61333400  |
| H                                    | 6.99229000  | 3.83762200  | -2.17566500 | H | -2.90934800 | 1.47292600  | 2.30029800  |
| H                                    | 5.78429800  | 2.57625000  | -2.47350300 | C | 2.42199100  | 1.82424100  | -0.80005700 |
| H                                    | 5.46954300  | 4.25042000  | -2.98339200 | C | 3.14034500  | 2.80682100  | -0.09982400 |
|                                      |             |             |             | C | 3.10115900  | 4.13633600  | -0.52084900 |
| <b>TS3</b>                           |             |             |             | C | 2.33672400  | 4.49764700  | -1.63442200 |
| SCF Energy = -2579.672331 a.u.       |             |             |             | C | 1.61404800  | 3.52671400  | -2.33135100 |
| Gibbs Free Energy = -2579.07607 a.u. |             |             |             | C | 1.65730500  | 2.19480200  | -1.91635000 |
|                                      |             |             |             | H | 3.71535500  | 2.53844400  | 0.78144700  |
| C                                    | 0.87263400  | 0.26254900  | 2.13199900  | H | 3.65740100  | 4.89209500  | 0.02650400  |
| C                                    | 0.71978000  | 0.39307000  | 3.51906400  | H | 2.29725300  | 5.53589800  | -1.95141100 |

|    |             |             |             |
|----|-------------|-------------|-------------|
| H  | 1.00666200  | 3.80593000  | -3.18719600 |
| H  | 1.07524500  | 1.43920900  | -2.43831600 |
| C  | 4.00462800  | -0.65992600 | -0.50978600 |
| C  | 5.14517900  | 0.07740100  | -0.85857500 |
| C  | 6.37030300  | -0.57121400 | -1.03658400 |
| C  | 6.46721400  | -1.95359200 | -0.86364800 |
| C  | 5.33162700  | -2.69430600 | -0.52104200 |
| C  | 4.10494900  | -2.05380800 | -0.35270800 |
| H  | 5.08310500  | 1.15216100  | -0.99514400 |
| H  | 7.24892100  | 0.00710300  | -1.30847500 |
| H  | 7.42150200  | -2.45385300 | -1.00226200 |
| H  | 5.39845100  | -3.77133000 | -0.39527700 |
| H  | 3.21631700  | -2.63364100 | -0.11569900 |
| C  | -2.61795500 | -2.75438300 | -0.94841600 |
| C  | -2.77026300 | -1.57933300 | -1.74735000 |
| C  | -1.66123600 | -1.23687900 | -2.54597400 |
| C  | -1.45421800 | -3.47882000 | -0.88780800 |
| H  | -3.46971200 | -3.10380700 | -0.36954900 |
| H  | -1.71926000 | -0.37484000 | -3.20602300 |
| C  | 1.20495900  | -4.90898300 | -0.57599200 |
| H  | -1.42492100 | -4.38231200 | -0.28542000 |
| H  | 0.71280200  | -5.83956800 | -0.90956900 |
| H  | 2.27486600  | -5.13442800 | -0.50025300 |
| H  | 0.84346700  | -4.73074900 | 0.44852900  |
| C  | -3.96599800 | -0.73152300 | -1.66237900 |
| C  | -4.37477800 | 0.10182800  | -2.73065100 |
| C  | -4.72998200 | -0.66523900 | -0.47245500 |
| C  | -5.46742300 | 0.95878200  | -2.60981300 |
| H  | -3.83556400 | 0.06442400  | -3.67302500 |
| C  | -5.82898900 | 0.18396500  | -0.35925400 |
| H  | -4.42801500 | -1.25173000 | 0.38949200  |
| C  | -6.20790000 | 1.00846800  | -1.42344900 |
| H  | -5.75117600 | 1.58315000  | -3.45385300 |
| H  | -6.37925000 | 0.21731800  | 0.57807400  |
| H  | -7.05947800 | 1.67654600  | -1.33086900 |
| Cu | 0.38626000  | -0.92058300 | -0.84438500 |
| C  | -0.25365500 | -3.09742200 | -1.62696000 |
| C  | -0.44764000 | -1.94266000 | -2.51927900 |
| H  | 0.29925300  | -1.74207800 | -3.28666500 |
| C  | 0.96674700  | -3.73515900 | -1.48786900 |
| H  | 1.78837700  | -3.40603900 | -2.12023500 |

**IM4**

SCF Energy = -2579.674361 a.u.

Gibbs Free Energy = -2579.080484 a.u.

|   |             |             |             |
|---|-------------|-------------|-------------|
| C | -0.72696100 | -0.64508800 | 2.11220200  |
| C | -0.52263000 | -0.94181700 | 3.46676600  |
| C | -1.60647100 | -1.08259100 | 4.33421800  |
| C | -2.90934700 | -0.92220700 | 3.85695800  |
| C | -3.12906700 | -0.63003600 | 2.51002000  |
| C | -2.05054400 | -0.49770200 | 1.62504400  |
| H | 0.48842400  | -1.05315100 | 3.84701700  |
| H | -1.43261100 | -1.31003200 | 5.38195400  |
| H | -3.75437900 | -1.02125100 | 4.53216200  |
| H | -4.14380900 | -0.49780100 | 2.14727400  |
| P | 0.67684600  | -0.38549300 | 0.94200300  |
| P | -2.27313500 | -0.13309400 | -0.17202600 |
| C | 1.08580500  | -2.05569000 | 0.30219200  |
| C | 0.37141400  | -3.20661700 | 0.66254900  |
| C | 0.66360300  | -4.43176100 | 0.05793300  |
| C | 1.67837000  | -4.52108800 | -0.89696400 |
| C | 2.40297600  | -3.37843000 | -1.25068000 |
| C | 2.10388900  | -2.14974400 | -0.66382600 |
| H | -0.42253000 | -3.14848900 | 1.39955700  |
| H | 0.09297400  | -5.31420200 | 0.33270200  |
| H | 1.90218800  | -5.47514500 | -1.36591500 |
| H | 3.19774300  | -3.43658500 | -1.98900200 |
| H | 2.66468700  | -1.26688500 | -0.95419100 |
| C | 2.09233200  | 0.10250000  | 1.99537500  |
| C | 2.17747000  | 1.45283900  | 2.37281600  |
| C | 3.25377700  | 1.90245100  | 3.13739500  |
| C | 4.26172400  | 1.01193200  | 3.51981700  |
| C | 4.18339200  | -0.33162400 | 3.14441900  |
| C | 3.10229100  | -0.78802800 | 2.38747000  |
| H | 1.41681400  | 2.15478200  | 2.04353000  |
| H | 3.31375100  | 2.94975000  | 3.41957100  |
| H | 5.10669500  | 1.36520700  | 4.10407500  |
| H | 4.96502600  | -1.02650700 | 3.43825300  |
| H | 3.05602800  | -1.83124200 | 2.09183800  |
| C | -2.41651300 | -1.79819500 | -0.93065400 |
| C | -3.06273700 | -2.87733400 | -0.30701600 |

|   |             |             |             |                                      |             |             |             |
|---|-------------|-------------|-------------|--------------------------------------|-------------|-------------|-------------|
| C | -3.08070000 | -4.13161800 | -0.91810400 | H                                    | 6.64859500  | -1.47537400 | -1.70429400 |
| C | -2.44534900 | -4.32243000 | -2.14863100 | Cu                                   | -0.29475200 | 0.87367300  | -0.74110300 |
| C | -1.79259200 | -3.25578400 | -2.77089100 | C                                    | 0.04895500  | 3.60532900  | -1.25152100 |
| C | -1.77736900 | -1.99913000 | -2.16413700 | C                                    | 0.11815600  | 2.43294800  | -2.13603700 |
| H | -3.53506000 | -2.74516900 | 0.66173800  | H                                    | -0.67846800 | 2.29719800  | -2.86728400 |
| H | -3.58129500 | -4.96232100 | -0.42874200 | C                                    | -1.05969100 | 4.41394300  | -1.17575700 |
| H | -2.45101900 | -5.30297600 | -2.61598700 | H                                    | -1.90690200 | 4.18585500  | -1.81995300 |
| H | -1.28567200 | -3.40339600 | -3.72003600 |                                      |             |             |             |
| H | -1.24971400 | -1.17220700 | -2.63375300 | <b>TSS<sub>p</sub></b>               |             |             |             |
| C | -3.90807100 | 0.67963900  | -0.29986500 | SCF Energy = -3634.377966 a.u.       |             |             |             |
| C | -5.12314100 | -0.00854900 | -0.43732600 | Gibbs Free Energy = -3633.60312 a.u. |             |             |             |
| C | -6.32295900 | 0.70150500  | -0.51867200 |                                      |             |             |             |
| C | -6.31919900 | 2.09788700  | -0.46181900 | Cu                                   | 0.97682400  | 0.37169500  | -0.08968900 |
| C | -5.11084300 | 2.78841400  | -0.33400500 | C                                    | 3.87337300  | -0.51334600 | -1.26131100 |
| C | -3.90845400 | 2.08463500  | -0.26085100 | C                                    | 4.79397700  | -1.09817800 | -2.14176900 |
| H | -5.13592700 | -1.09280700 | -0.48702800 | C                                    | 5.93695700  | -0.40265600 | -2.53828200 |
| H | -7.26035000 | 0.16321100  | -0.62742900 | C                                    | 6.16894300  | 0.88970700  | -2.06231100 |
| H | -7.25479100 | 2.64616800  | -0.52714500 | C                                    | 5.26362900  | 1.48365900  | -1.18140800 |
| H | -5.10104500 | 3.87435200  | -0.30372700 | C                                    | 4.11730300  | 0.79319200  | -0.76622900 |
| H | -2.96748200 | 2.62733800  | -0.19060700 | H                                    | 4.61101500  | -2.09721700 | -2.52614600 |
| C | 2.40279900  | 3.06382800  | -0.64470500 | H                                    | 6.64052500  | -0.86688400 | -3.22314100 |
| C | 2.49167400  | 1.97305200  | -1.56071600 | H                                    | 7.05285000  | 1.43712700  | -2.37656700 |
| C | 1.31134800  | 1.70041300  | -2.29276300 | H                                    | 5.44762700  | 2.49045600  | -0.81853000 |
| C | 1.26712100  | 3.82223300  | -0.47736700 | P                                    | 2.31324000  | -1.36619100 | -0.76982000 |
| H | 3.27987800  | 3.32205700  | -0.05565600 | P                                    | 2.90008200  | 1.51105000  | 0.42356300  |
| H | 1.30674000  | 0.88954900  | -3.01838700 | C                                    | 2.73984500  | -2.40370200 | 0.67991500  |
| C | -1.17407300 | 5.60586400  | -0.26081400 | C                                    | 4.03258500  | -2.47581100 | 1.21631900  |
| H | 1.29964500  | 4.66559200  | 0.20739400  | C                                    | 4.26432400  | -3.19946000 | 2.38882600  |
| H | -0.42722200 | 6.39054800  | -0.46873000 | C                                    | 3.21434400  | -3.86531800 | 3.02426700  |
| H | -2.15805900 | 6.07882200  | -0.35474600 | C                                    | 1.92467200  | -3.80566900 | 2.48651400  |
| H | -1.04757600 | 5.35018300  | 0.80455900  | C                                    | 1.68388200  | -3.07089100 | 1.32684700  |
| C | 3.65515900  | 1.08253400  | -1.62411000 | H                                    | 4.85494100  | -1.95851200 | 0.73318400  |
| C | 3.94519400  | 0.31150100  | -2.77662000 | H                                    | 5.26670200  | -3.23735900 | 2.80542300  |
| C | 4.51251300  | 0.90529200  | -0.51105300 | H                                    | 3.39836200  | -4.42532500 | 3.93679100  |
| C | 5.00109300  | -0.59758600 | -2.80162500 | H                                    | 1.10123100  | -4.32128700 | 2.97239300  |
| H | 3.33946500  | 0.43680700  | -3.66977100 | H                                    | 0.67647900  | -3.01549700 | 0.92572200  |
| C | 5.57396800  | 0.00313600  | -0.54308500 | C                                    | 1.94241500  | -2.52502200 | -2.13480700 |
| H | 4.31249300  | 1.44380500  | 0.40925400  | C                                    | 1.26743000  | -2.00513700 | -3.25154500 |
| C | 5.82733700  | -0.76458200 | -1.68437400 | C                                    | 0.91156100  | -2.84147100 | -4.30927900 |
| H | 5.18816200  | -1.17187400 | -3.70613400 | C                                    | 1.21244700  | -4.20601400 | -4.25337600 |
| H | 6.19282500  | -0.11697000 | 0.34285000  | C                                    | 1.87926500  | -4.72876000 | -3.14220800 |

|   |             |             |             |   |             |             |             |
|---|-------------|-------------|-------------|---|-------------|-------------|-------------|
| C | 2.24699500  | -3.89274600 | -2.08568100 | H | -2.07690800 | 3.05025100  | -3.67979800 |
| H | 0.99908900  | -0.95281400 | -3.27844100 | H | -1.44654800 | 4.57250200  | -3.06971600 |
| H | 0.38575400  | -2.43210900 | -5.16709000 | H | -0.33064200 | 3.30757000  | -3.59858800 |
| H | 0.92318500  | -4.86003100 | -5.07103400 | C | -1.68570000 | -2.63098800 | -0.22787600 |
| H | 2.11278200  | -5.78865400 | -3.09556200 | C | -2.11754000 | -3.02018500 | 1.05821000  |
| H | 2.75631500  | -4.30760800 | -1.22161700 | C | -1.28003300 | -3.64599300 | -1.11930400 |
| C | 3.54658800  | 0.97497800  | 2.05472200  | C | -2.12541200 | -4.36342300 | 1.43578300  |
| C | 4.91685200  | 0.86722500  | 2.34085400  | H | -2.48131300 | -2.26551200 | 1.74783700  |
| C | 5.33746000  | 0.38646300  | 3.58145800  | C | -1.29251200 | -4.98756700 | -0.73830500 |
| C | 4.39667600  | 0.00029100  | 4.54057600  | H | -0.90989800 | -3.38050600 | -2.10372900 |
| C | 3.03169700  | 0.10053400  | 4.26130900  | C | -1.70897000 | -5.35672100 | 0.54361300  |
| C | 2.60788800  | 0.58541100  | 3.02324400  | H | -2.46976100 | -4.63549600 | 2.43047000  |
| H | 5.65380400  | 1.13969400  | 1.59147300  | H | -0.95420000 | -5.74346600 | -1.44217700 |
| H | 6.39925900  | 0.30368800  | 3.79568500  | H | -1.71045500 | -6.40128400 | 0.84242400  |
| H | 4.72767800  | -0.38517300 | 5.50069100  | C | -3.41772900 | 3.26539100  | 0.44357000  |
| H | 2.29807700  | -0.20909400 | 4.99981000  | C | -3.81420700 | 2.19030700  | 1.20870600  |
| H | 1.54613800  | 0.64406000  | 2.79593200  | C | -4.45343800 | 1.06011500  | 0.66361600  |
| C | 3.10549400  | 3.32435300  | 0.31030300  | C | -4.57867700 | 1.07636400  | -0.73968400 |
| C | 4.02619300  | 4.05893300  | 1.07265100  | C | -4.20861300 | 2.15039400  | -1.51875200 |
| C | 4.10642800  | 5.44531000  | 0.92449900  | C | -3.48591100 | 3.23724100  | -0.96908500 |
| C | 3.27316800  | 6.10559300  | 0.01754200  | O | -3.79529500 | -0.51884300 | 2.29868000  |
| C | 2.34928500  | 5.37929400  | -0.73927000 | F | -3.59837900 | 2.26672000  | 2.53877800  |
| C | 2.25973600  | 3.99541100  | -0.58945000 | F | -2.77595100 | 4.30852100  | 1.02737900  |
| H | 4.67205700  | 3.55584800  | 1.78551300  | F | -4.32540600 | 2.07937200  | -2.87069300 |
| H | 4.81923100  | 6.00913800  | 1.51962600  | F | -5.07241800 | -0.01218000 | -1.37596500 |
| H | 3.33682300  | 7.18446100  | -0.09199100 | F | -3.55380700 | 4.44339500  | -1.62029600 |
| H | 1.68942700  | 5.88905800  | -1.43545300 | C | -4.67473500 | -0.15297100 | 1.50383900  |
| H | 1.52089200  | 3.43658700  | -1.15870700 | N | -5.84540100 | -0.84690000 | 1.34203200  |
| C | -1.72861000 | -0.76916600 | -1.94036700 | C | -5.97963700 | -2.16001300 | 1.98517300  |
| C | -1.59346700 | -1.20628400 | -0.60619500 | C | -7.08297600 | -0.25792500 | 0.81343900  |
| C | -1.23966100 | -0.22143500 | 0.34892900  | H | -7.69459400 | -1.07944400 | 0.42784900  |
| C | -1.03675800 | 1.12580700  | -0.00499100 | H | -6.86583700 | 0.38470900  | -0.03684400 |
| C | -1.22157400 | 1.57851800  | -1.36542800 | H | -5.19637400 | -2.24547100 | 2.73865100  |
| C | -1.53675300 | 0.55368500  | -2.31286500 | H | -6.94450400 | -2.19846700 | 2.50307500  |
| H | -2.00838900 | -1.48741700 | -2.70611500 | C | -7.85001400 | 0.52621200  | 1.88017800  |
| H | -1.17721100 | -0.49154100 | 1.39775800  | C | -5.87086700 | -3.29791300 | 0.96806800  |
| H | -0.94712300 | 1.87266400  | 0.78054800  | H | -4.90048200 | -3.26756900 | 0.46449400  |
| C | -1.28805900 | 2.95659300  | -1.65871200 | H | -5.96873300 | -4.26806200 | 1.46850000  |
| C | -1.28112200 | 3.49149700  | -3.06982200 | H | -6.65506100 | -3.23013800 | 0.20603500  |
| H | -0.90443700 | 3.62816000  | -0.89265800 | H | -8.09083600 | -0.10314200 | 2.74362100  |
| H | -1.69865000 | 0.82942600  | -3.35004100 | H | -7.25355000 | 1.37475000  | 2.23159800  |

|                                       |             |             |             |   |             |             |             |
|---------------------------------------|-------------|-------------|-------------|---|-------------|-------------|-------------|
| H                                     | -8.78925400 | 0.91319900  | 1.46924200  | C | 4.67865500  | 1.39600100  | 2.44222200  |
| <b>IM5</b>                            |             |             |             | C | 5.04667900  | 1.10716900  | 3.75695200  |
| SCF Energy = -3634.410566 a.u.        |             |             |             | C | 4.07433500  | 0.75236900  | 4.69682200  |
| Gibbs Free Energy = -3633.633347 a.u. |             |             |             | C | 2.72966100  | 0.69206400  | 4.32333100  |
|                                       |             |             |             | C | 2.35791700  | 0.98294000  | 3.01011700  |
| Cu                                    | 1.00004100  | 0.25277100  | -0.15572200 | H | 5.44252400  | 1.64718500  | 1.71277200  |
| C                                     | 4.02397700  | -0.45536900 | -1.08474500 | H | 6.09311400  | 1.15042000  | 4.04517500  |
| C                                     | 5.05702200  | -1.02866100 | -1.83874000 | H | 4.36538900  | 0.51744600  | 5.71660000  |
| C                                     | 6.17077600  | -0.27239300 | -2.20524000 | H | 1.97217300  | 0.40985900  | 5.04854400  |
| C                                     | 6.25966600  | 1.06926400  | -1.82703100 | H | 1.31370800  | 0.92010900  | 2.71449100  |
| C                                     | 5.24015100  | 1.65295000  | -1.07339700 | C | 2.79069800  | 3.41570100  | 0.01706500  |
| C                                     | 4.12150600  | 0.90220100  | -0.68740500 | C | 3.49506000  | 4.34229700  | 0.79905300  |
| H                                     | 4.98435000  | -2.06666400 | -2.14971700 | C | 3.43176200  | 5.70350900  | 0.49104200  |
| H                                     | 6.96325100  | -0.72840800 | -2.79131600 | C | 2.67023100  | 6.14591400  | -0.59357200 |
| H                                     | 7.12097600  | 1.66294500  | -2.11916400 | C | 1.96315800  | 5.22605400  | -1.37392000 |
| H                                     | 5.31219200  | 2.69821600  | -0.78823100 | C | 2.01753400  | 3.86746700  | -1.06628700 |
| P                                     | 2.50480600  | -1.40373400 | -0.64674300 | H | 4.08283400  | 4.00780200  | 1.64841800  |
| P                                     | 2.76311300  | 1.61814400  | 0.33962000  | H | 3.97577200  | 6.41836800  | 1.10180700  |
| C                                     | 2.89642000  | -2.32448900 | 0.88665000  | H | 2.62011900  | 7.20592100  | -0.82521000 |
| C                                     | 4.07858100  | -2.11282200 | 1.60918600  | H | 1.35904200  | 5.56518900  | -2.21036400 |
| C                                     | 4.26036500  | -2.73069300 | 2.84917500  | H | 1.45088500  | 3.15548800  | -1.66055800 |
| C                                     | 3.27350500  | -3.57086500 | 3.36825300  | C | -1.62597900 | -1.06152900 | -1.95247700 |
| C                                     | 2.09646200  | -3.79343900 | 2.64572400  | C | -1.42749500 | -1.49433800 | -0.63921300 |
| C                                     | 1.90128300  | -3.16659300 | 1.41627700  | C | -1.12080100 | -0.51756200 | 0.34015800  |
| H                                     | 4.84838000  | -1.45595300 | 1.21829300  | C | -1.08440400 | 0.84995500  | 0.01291200  |
| H                                     | 5.17340700  | -2.54925600 | 3.40865400  | C | -1.33657600 | 1.28066900  | -1.31637700 |
| H                                     | 3.41790800  | -4.04920800 | 4.33280500  | C | -1.57360900 | 0.30008500  | -2.28481800 |
| H                                     | 1.32358400  | -4.44650600 | 3.04088400  | H | -1.86177300 | -1.78687700 | -2.72517800 |
| H                                     | 0.97855500  | -3.33322800 | 0.86826000  | H | -0.99938300 | -0.81625600 | 1.37613800  |
| C                                     | 2.28272600  | -2.63716200 | -1.97417300 | H | -1.00260900 | 1.58726300  | 0.80445300  |
| C                                     | 1.61412400  | -2.20575300 | -3.13242500 | C | -1.56813900 | 2.76084400  | -1.56156100 |
| C                                     | 1.35759000  | -3.10130600 | -4.17009000 | C | -1.32239400 | 3.23804700  | -2.99522300 |
| C                                     | 1.75127400  | -4.43805100 | -4.05160700 | H | -0.89898700 | 3.32550400  | -0.90462600 |
| C                                     | 2.41284300  | -4.87248200 | -2.89992200 | H | -1.79454700 | 0.59573700  | -3.30423000 |
| C                                     | 2.68283500  | -3.97642100 | -1.86336900 | H | -2.03460500 | 2.80794200  | -3.70086900 |
| H                                     | 1.27811900  | -1.17471100 | -3.20912700 | H | -1.43066800 | 4.32323400  | -3.03960700 |
| H                                     | 0.83671100  | -2.76175000 | -5.06063100 | H | -0.30883400 | 2.97775200  | -3.32226100 |
| H                                     | 1.53836100  | -5.13957500 | -4.85296200 | C | -1.49185600 | -2.92158400 | -0.25021100 |
| H                                     | 2.71873000  | -5.91056800 | -2.80651500 | C | -2.07553800 | -3.29274700 | 0.97583600  |
| H                                     | 3.18803000  | -4.32353900 | -0.96762200 | C | -0.93046600 | -3.91999100 | -1.06488500 |
| C                                     | 3.32893300  | 1.33895700  | 2.06074400  | C | -2.07408700 | -4.62786100 | 1.38147100  |

|                                       |             |             |             |   |             |             |             |
|---------------------------------------|-------------|-------------|-------------|---|-------------|-------------|-------------|
| H                                     | -2.56335500 | -2.53544400 | 1.58466800  | C | 0.94501100  | 1.35534900  | 1.81096400  |
| C                                     | -0.92770600 | -5.25308600 | -0.65220700 | C | 1.02175300  | 1.10934100  | 3.18871800  |
| H                                     | -0.46214300 | -3.64674600 | -2.00444500 | C | 2.20248300  | 1.34569300  | 3.89127000  |
| C                                     | -1.49236800 | -5.61109100 | 0.57483200  | C | 3.32534400  | 1.83246800  | 3.22130100  |
| H                                     | -2.53632300 | -4.90157600 | 2.32595100  | C | 3.25208300  | 2.09577300  | 1.85387600  |
| H                                     | -0.46962100 | -6.00774400 | -1.28534400 | C | 2.07148700  | 1.86896900  | 1.13111200  |
| H                                     | -1.48592000 | -6.64855600 | 0.89717900  | H | 0.16083200  | 0.71621500  | 3.71798300  |
| C                                     | -3.10148800 | 3.00860800  | 0.44790900  | H | 2.24348200  | 1.14450200  | 4.95807600  |
| C                                     | -3.75276500 | 2.04957400  | 1.16902400  | H | 4.25184900  | 2.01287700  | 3.75916500  |
| C                                     | -4.64185900 | 1.09874200  | 0.61151000  | H | 4.12527000  | 2.48810900  | 1.34288200  |
| C                                     | -4.71683100 | 1.20581900  | -0.80018500 | P | -0.60360500 | 0.97383400  | 0.87434200  |
| C                                     | -4.06791400 | 2.14813700  | -1.54791300 | P | 1.96843400  | 2.26630400  | -0.68457100 |
| C                                     | -3.03103500 | 3.04838200  | -1.02104500 | C | -1.38989200 | 2.61174300  | 0.63187300  |
| O                                     | -4.14484200 | -0.69697900 | 2.08670600  | C | -1.27431300 | 3.63696000  | 1.58329800  |
| F                                     | -3.52457900 | 2.03034100  | 2.50618200  | C | -1.90209500 | 4.86465700  | 1.36796000  |
| F                                     | -2.14735000 | 3.76530500  | 1.09990900  | C | -2.64622800 | 5.07675800  | 0.20398000  |
| F                                     | -4.09723100 | 2.00704300  | -2.92106100 | C | -2.76262800 | 4.05994300  | -0.74670300 |
| F                                     | -5.43942900 | 0.27762700  | -1.48741900 | C | -2.13652300 | 2.83133300  | -0.53481700 |
| F                                     | -3.28555500 | 4.43833700  | -1.47264300 | H | -0.69384100 | 3.47767300  | 2.48739500  |
| C                                     | -4.97694100 | -0.14114400 | 1.34500500  | H | -1.80684400 | 5.65560800  | 2.10657800  |
| N                                     | -6.21980600 | -0.70373900 | 1.15235300  | H | -3.13221300 | 6.03393400  | 0.03721200  |
| C                                     | -6.43869500 | -2.06378800 | 1.65605000  | H | -3.34437500 | 4.21790100  | -1.64871400 |
| C                                     | -7.39636600 | 0.02516700  | 0.67316100  | H | -2.22004100 | 2.03925400  | -1.27355400 |
| H                                     | -7.98320000 | -0.65130500 | 0.04054500  | C | -1.67969900 | 0.08729900  | 2.06677300  |
| H                                     | -7.07862000 | 0.84871900  | 0.03873300  | C | -1.30893300 | -1.22727600 | 2.39378200  |
| H                                     | -5.90981500 | -2.17932700 | 2.60490200  | C | -2.13261400 | -2.01448400 | 3.19493200  |
| H                                     | -7.50767200 | -2.18561200 | 1.85339700  | C | -3.33411800 | -1.49105200 | 3.68475200  |
| C                                     | -8.25470800 | 0.56796700  | 1.81921500  | C | -3.69650500 | -0.17757400 | 3.38038900  |
| C                                     | -5.96339400 | -3.12037000 | 0.65599300  | C | -2.87426900 | 0.61385900  | 2.57170100  |
| H                                     | -4.89070100 | -3.01417200 | 0.47043800  | H | -0.36038800 | -1.60940000 | 2.03520900  |
| H                                     | -6.14440200 | -4.13061300 | 1.04169400  | H | -1.83869600 | -3.03360500 | 3.42326700  |
| H                                     | -6.48814600 | -3.01880700 | -0.30046100 | H | -3.98293300 | -2.10430800 | 4.30396400  |
| H                                     | -8.59569800 | -0.23153100 | 2.48569900  | H | -4.62427700 | 0.23531900  | 3.76709500  |
| H                                     | -7.67993600 | 1.28527400  | 2.41487900  | H | -3.17565600 | 1.62607500  | 2.32493200  |
| H                                     | -9.14034800 | 1.07961100  | 1.42512400  | C | 2.41623300  | 4.05537700  | -0.70461800 |
|                                       |             |             |             | C | 2.13040500  | 4.90684100  | 0.37595500  |
| <b>IM6</b>                            |             |             |             | C | 2.34816800  | 6.28279100  | 0.27474600  |
| SCF Energy = -3634.491155 a.u.        |             |             |             | C | 2.85682700  | 6.83250200  | -0.90362500 |
| Gibbs Free Energy = -3633.709336 a.u. |             |             |             | C | 3.13660600  | 5.99602700  | -1.98837800 |
|                                       |             |             |             | C | 2.91009000  | 4.62292200  | -1.89402200 |
| Cu                                    | -0.26249900 | -0.08560900 | -0.98810600 | H | 1.73843200  | 4.49841300  | 1.30154400  |

|   |             |             |             |                                       |             |             |             |
|---|-------------|-------------|-------------|---------------------------------------|-------------|-------------|-------------|
| H | 2.12363000  | 6.92393200  | 1.12307800  | H                                     | -3.35960000 | -5.61591000 | -0.45797000 |
| H | 3.03143700  | 7.90212600  | -0.97857600 | C                                     | 0.09210300  | -3.65496100 | -1.82729300 |
| H | 3.53052500  | 6.41307000  | -2.91133600 | C                                     | 1.26042600  | -3.27292800 | -1.17559500 |
| H | 3.12860300  | 3.98689200  | -2.74778700 | C                                     | 1.36023200  | -3.30633900 | 0.20979900  |
| C | 3.46743400  | 1.41838200  | -1.35890300 | C                                     | 0.25605800  | -3.79305900 | 0.90686300  |
| C | 4.77115500  | 1.93840300  | -1.28284600 | C                                     | -0.92377900 | -4.12651700 | 0.26130000  |
| C | 5.85023500  | 1.22565500  | -1.80763200 | C                                     | -1.04901900 | -4.05155300 | -1.12860800 |
| C | 5.64276300  | -0.01797300 | -2.41211400 | O                                     | 2.06152500  | -1.53896300 | 1.57955300  |
| C | 4.35156800  | -0.54261300 | -2.49202700 | F                                     | 2.30386100  | -2.83408900 | -1.90703900 |
| C | 3.26605800  | 0.17223500  | -1.97889700 | F                                     | 0.06294300  | -3.58456900 | -3.17058300 |
| H | 4.94370100  | 2.90998200  | -0.82992100 | F                                     | -1.97954500 | -4.47998300 | 1.02544800  |
| H | 6.85217500  | 1.64199900  | -1.74561400 | F                                     | 0.30369100  | -3.87235600 | 2.25420800  |
| H | 6.48402100  | -0.57144600 | -2.82056100 | F                                     | 0.15193800  | -0.79064400 | -2.62298100 |
| H | 4.18033300  | -1.50659200 | -2.96123200 | C                                     | 2.42484000  | -2.55731200 | 0.98132000  |
| H | 2.26367800  | -0.23488100 | -2.08778500 | N                                     | 3.69217900  | -3.01825000 | 0.99302500  |
| C | -4.80027800 | -1.58455400 | -0.39191000 | C                                     | 4.68162400  | -2.27840300 | 1.79391000  |
| C | -4.47822700 | -0.44440300 | -1.14782800 | C                                     | 4.11235000  | -4.27039700 | 0.35247100  |
| C | -3.48248500 | -0.57430900 | -2.13204900 | H                                     | 5.15888400  | -4.14594600 | 0.05899000  |
| C | -2.84851400 | -1.79274300 | -2.35446700 | H                                     | 3.54962800  | -4.41157900 | -0.57079000 |
| C | -3.18019200 | -2.93057200 | -1.60497500 | H                                     | 4.16967700  | -1.87008900 | 2.66815200  |
| C | -4.16054200 | -2.80575000 | -0.61326400 | H                                     | 5.42475000  | -3.00106000 | 2.14318300  |
| H | -5.57226500 | -1.52304900 | 0.36947600  | C                                     | 3.94612200  | -5.47529700 | 1.27801800  |
| H | -3.17385100 | 0.29179600  | -2.70941600 | C                                     | 5.34182100  | -1.15354200 | 0.99948600  |
| H | -2.03796200 | -1.84070900 | -3.07448700 | H                                     | 4.59251300  | -0.43401700 | 0.66153700  |
| C | -2.38333700 | -4.21584300 | -1.84867000 | H                                     | 6.06893500  | -0.62585200 | 1.62659300  |
| C | -3.11558600 | -5.52425400 | -1.51684900 | H                                     | 5.86558300  | -1.54310200 | 0.12193800  |
| H | -2.14945700 | -4.24155800 | -2.91596800 | H                                     | 4.53216800  | -5.35154800 | 2.19454000  |
| H | -4.43677200 | -3.66129400 | -0.00624100 | H                                     | 2.89464300  | -5.59756800 | 1.55937600  |
| H | -4.04557400 | -5.58378600 | -2.09066000 | H                                     | 4.28045800  | -6.39111100 | 0.77900800  |
| H | -2.49073700 | -6.37984400 | -1.79124000 |                                       |             |             |             |
| C | -5.14635500 | 0.86072300  | -0.91429300 | <b>IM7</b>                            |             |             |             |
| C | -5.41220300 | 1.73782500  | -1.98160200 | SCF Energy = -2138.116554 a.u.        |             |             |             |
| C | -5.51297600 | 1.26388500  | 0.38196100  | Gibbs Free Energy = -2137.733784 a.u. |             |             |             |
| C | -6.01483400 | 2.97617000  | -1.75864400 |                                       |             |             |             |
| H | -5.16231700 | 1.44032300  | -2.99569500 | Cu                                    | -0.01865800 | -0.73046200 | -1.90578700 |
| C | -6.10992200 | 2.50453700  | 0.60541200  | C                                     | -0.75071600 | -0.88089000 | 1.25065800  |
| H | -5.30004500 | 0.61170400  | 1.22141900  | C                                     | -1.45650800 | -1.30175700 | 2.38577900  |
| C | -6.36202800 | 3.36848400  | -0.46318800 | C                                     | -0.77519300 | -1.71535500 | 3.53161200  |
| H | -6.21559300 | 3.63421400  | -2.59979100 | C                                     | 0.62117400  | -1.71554400 | 3.55243000  |
| H | -6.36989700 | 2.80010300  | 1.61834600  | C                                     | 1.33683300  | -1.30759100 | 2.42573200  |
| H | -6.82438800 | 4.33588500  | -0.28884200 | C                                     | 0.66651900  | -0.88886800 | 1.26811700  |



|   |             |             |             |                                     |             |             |             |
|---|-------------|-------------|-------------|-------------------------------------|-------------|-------------|-------------|
| H | -2.54221600 | -1.30956900 | 2.37477400  | C                                   | 5.53281800  | -1.12705800 | 0.60634100  |
| H | -1.33487000 | -2.03862800 | 4.40466500  | C                                   | 5.69963900  | -2.41392200 | 0.08755700  |
| H | 1.15442000  | -2.03769400 | 4.44223600  | C                                   | 4.62849700  | -3.05964900 | -0.53650800 |
| H | 2.42218400  | -1.32066300 | 2.44632900  | C                                   | 3.39347000  | -2.41907800 | -0.64228900 |
| P | -1.58145900 | -0.30571300 | -0.29559900 | H                                   | 4.17300800  | 0.51334200  | 0.91655000  |
| P | 1.54996900  | -0.37984200 | -0.27215300 | H                                   | 6.36543800  | -0.62125900 | 1.08731600  |
| C | -1.77500800 | 1.50030200  | -0.02182500 | H                                   | 6.66336700  | -2.90961100 | 0.16320900  |
| C | -1.99860600 | 2.06767200  | 1.24253000  | H                                   | 4.75712400  | -4.05623300 | -0.94931200 |
| C | -2.09111100 | 3.45296700  | 1.38267900  | H                                   | 2.56464600  | -2.91328100 | -1.14384800 |
| C | -1.95317200 | 4.28219100  | 0.26595000  | F                                   | -0.00664000 | -1.22545200 | -3.69156800 |
| C | -1.72521200 | 3.72480700  | -0.99434400 | <b>P<sub>1</sub></b>                |             |             |             |
| C | -1.63509500 | 2.33948600  | -1.13793100 | SCF Energy = -1496.352402 a.u.      |             |             |             |
| H | -2.08284100 | 1.43113500  | 2.11808400  | Gibbs Free Energy = -1495.9869 a.u. |             |             |             |
| H | -2.26012800 | 3.88561700  | 2.36477700  |                                     |             |             |             |
| H | -2.01381100 | 5.36079100  | 0.38007700  | C                                   | -3.68387300 | -0.88016300 | -0.93550600 |
| H | -1.60442200 | 4.36640800  | -1.86232000 | C                                   | -4.01320300 | -0.09811700 | 0.18381800  |
| H | -1.43604400 | 1.90274100  | -2.11363100 | C                                   | -3.20283000 | -0.21870500 | 1.32757600  |
| C | -3.26314700 | -1.03096500 | -0.20678800 | C                                   | -2.11313900 | -1.08425600 | 1.34319900  |
| C | -3.42191400 | -2.31955700 | -0.74380500 | C                                   | -1.78859800 | -1.86382800 | 0.22316100  |
| C | -4.66462300 | -2.95158400 | -0.70403000 | C                                   | -2.59103900 | -1.74703700 | -0.91707400 |
| C | -5.76448700 | -2.29594300 | -0.14295800 | H                                   | -4.27396300 | -0.79345700 | -1.84324000 |
| C | -5.61732900 | -1.00782400 | 0.37751800  | H                                   | -3.44447100 | 0.35061300  | 2.22039000  |
| C | -4.37218300 | -0.37552400 | 0.34868400  | H                                   | -1.50270000 | -1.16410200 | 2.24005000  |
| H | -2.57054400 | -2.82056800 | -1.19902900 | C                                   | -0.56056100 | -2.77090100 | 0.29006500  |
| H | -4.77671100 | -3.94895000 | -1.11970000 | C                                   | -0.58334300 | -3.97286200 | -0.66940800 |
| H | -6.73449200 | -2.78445400 | -0.11929600 | H                                   | -0.52164500 | -3.16984600 | 1.30699400  |
| H | -6.47191800 | -0.49323900 | 0.80799500  | H                                   | -2.36431100 | -2.32484100 | -1.80624200 |
| H | -4.26803500 | 0.62525000  | 0.75591000  | H                                   | -0.53460700 | -3.66736800 | -1.71645700 |
| C | 1.82019500  | 1.42688900  | -0.07876000 | H                                   | 0.27324900  | -4.62329200 | -0.46902800 |
| C | 1.68120900  | 2.10533400  | 1.14008600  | H                                   | -1.49805500 | -4.55471900 | -0.52021300 |
| C | 1.85926900  | 3.48955000  | 1.19574800  | C                                   | -5.17402300 | 0.82785300  | 0.16010100  |
| C | 2.18410800  | 4.20387900  | 0.04038600  | C                                   | -5.11645900 | 2.07290800  | 0.81225000  |
| C | 2.32620200  | 3.53291500  | -1.17768800 | C                                   | -6.35731800 | 0.48861500  | -0.52051600 |
| C | 2.13669100  | 2.15280000  | -1.23932100 | C                                   | -6.20409600 | 2.94607300  | 0.78663800  |
| H | 1.42342800  | 1.55816800  | 2.04140300  | H                                   | -4.20453300 | 2.36853800  | 1.32273800  |
| H | 1.73857200  | 4.00935600  | 2.14200200  | C                                   | -7.44393400 | 1.36314000  | -0.54818600 |
| H | 2.31780700  | 5.28097700  | 0.08656100  | H                                   | -6.43436900 | -0.47671300 | -1.01219500 |
| H | 2.56992700  | 4.08548000  | -2.08069400 | C                                   | -7.37278700 | 2.59608700  | 0.10537200  |
| H | 2.21990300  | 1.63444400  | -2.19162700 | H                                   | -6.13442600 | 3.90582500  | 1.29137000  |
| C | 3.21508000  | -1.13198800 | -0.11003300 | H                                   | -8.35015600 | 1.07726100  | -1.07520500 |
| C | 4.29583300  | -0.48632100 | 0.51043700  | H                                   | -8.21881200 | 3.27722200  | 0.08388400  |

|                                       |             |             |             |                                       |             |             |             |
|---------------------------------------|-------------|-------------|-------------|---------------------------------------|-------------|-------------|-------------|
| C                                     | 1.02099800  | -1.29772300 | -1.08437500 | F                                     | 2.69677700  | 2.41888200  | 0.60921700  |
| C                                     | 2.16937800  | -0.52779500 | -1.22465200 | F                                     | 0.02369000  | 2.42002200  | 0.10985000  |
| C                                     | 3.04870600  | -0.33952300 | -0.16407500 | F                                     | 4.12703300  | 0.10873800  | 0.36053300  |
| C                                     | 2.73878300  | -0.96380500 | 1.03803800  | C                                     | -1.40615000 | 0.15027900  | -0.81112800 |
| C                                     | 1.58875200  | -1.73463400 | 1.17527400  | N                                     | -2.31788900 | -0.16737700 | 0.13670400  |
| C                                     | 0.70185800  | -1.93516800 | 0.11675200  | C                                     | -3.73969600 | -0.14197600 | -0.23576400 |
| O                                     | 5.36035600  | -0.24285900 | -0.67112000 | C                                     | -1.98516300 | -0.50340500 | 1.52719800  |
| F                                     | 2.41602000  | 0.06746200  | -2.41006000 | H                                     | -2.74526600 | -0.04002200 | 2.16496600  |
| F                                     | 0.20226600  | -1.41955800 | -2.14944900 | H                                     | -1.03241300 | -0.03814700 | 1.78706200  |
| F                                     | 1.33493200  | -2.28743000 | 2.38036700  | H                                     | -3.82221200 | -0.46593300 | -1.27528200 |
| F                                     | 3.54784800  | -0.79675900 | 2.10208500  | H                                     | -4.25736400 | -0.87611100 | 0.38790000  |
| C                                     | 4.36096400  | 0.39837700  | -0.34604000 | C                                     | -1.92662400 | -2.01184900 | 1.77049100  |
| N                                     | 4.34662700  | 1.73666700  | -0.14177800 | C                                     | -4.35209300 | 1.24789600  | -0.06153600 |
| C                                     | 5.60067300  | 2.48054500  | -0.32470500 | H                                     | -3.84782800 | 1.96920700  | -0.71117100 |
| C                                     | 3.15902100  | 2.49742200  | 0.26792400  | H                                     | -5.41521800 | 1.22992900  | -0.32470400 |
| H                                     | 3.49242300  | 3.26767900  | 0.97123600  | H                                     | -4.26387900 | 1.59300100  | 0.97424500  |
| H                                     | 2.48726600  | 1.83879300  | 0.82188000  | H                                     | -2.88688200 | -2.48608900 | 1.54272700  |
| H                                     | 6.16683700  | 1.99663400  | -1.12316800 | H                                     | -1.16170400 | -2.47491600 | 1.14127000  |
| H                                     | 5.34023700  | 3.48851000  | -0.65993800 | H                                     | -1.68828500 | -2.21652100 | 2.81964900  |
| C                                     | 2.42860300  | 3.13039100  | -0.91719700 |                                       |             |             |             |
| C                                     | 6.42913700  | 2.53326500  | 0.95901500  | <b>TS4<sub>p</sub></b>                |             |             |             |
| H                                     | 6.71150000  | 1.52361000  | 1.27135300  | SCF Energy = -3634.376217 a.u.        |             |             |             |
| H                                     | 7.34407100  | 3.11331100  | 0.79690800  | Gibbs Free Energy = -3633.598863 a.u. |             |             |             |
| H                                     | 5.86820200  | 3.00376900  | 1.77358000  |                                       |             |             |             |
| H                                     | 3.08308400  | 3.81877500  | -1.46210500 | Cu                                    | 1.15719700  | 0.00195300  | -0.68086300 |
| H                                     | 2.08845700  | 2.36065500  | -1.61507800 | C                                     | 0.79981100  | 2.00643100  | 1.86761800  |
| H                                     | 1.55785800  | 3.69495400  | -0.56729700 | C                                     | 0.36331900  | 3.08502000  | 2.65009600  |
|                                       |             |             |             | C                                     | 0.25024400  | 2.96046600  | 4.03343600  |
| <b>S2</b>                             |             |             |             | C                                     | 0.58154000  | 1.75222600  | 4.65147600  |
| SCF Energy = -1054.695364 a.u.        |             |             |             | C                                     | 1.02148600  | 0.67346900  | 3.88552100  |
| Gibbs Free Energy = -1054.540986 a.u. |             |             |             | C                                     | 1.13355400  | 0.78043500  | 2.49015800  |
|                                       |             |             |             | H                                     | 0.09927200  | 4.02319100  | 2.17169900  |
| C                                     | 2.17445900  | -1.06961700 | -0.26408000 | H                                     | -0.09415500 | 3.80266200  | 4.62647700  |
| C                                     | 0.80771700  | -1.05199100 | -0.52360300 | H                                     | 0.49861000  | 1.64867600  | 5.72946200  |
| C                                     | 0.05551300  | 0.11131100  | -0.40226000 | H                                     | 1.27394400  | -0.26068800 | 4.37676400  |
| C                                     | 0.71667600  | 1.27709200  | -0.02832100 | P                                     | 0.98857500  | 2.16068200  | 0.03799400  |
| C                                     | 2.08215300  | 1.28844700  | 0.23706600  | P                                     | 1.73533900  | -0.63586100 | 1.46070200  |
| C                                     | 2.81302800  | 0.10934100  | 0.11208200  | C                                     | 2.52353500  | 3.14628600  | -0.14795300 |
| O                                     | -1.68627900 | 0.45953900  | -1.96891700 | C                                     | 2.58635100  | 4.53294000  | 0.06012200  |
| F                                     | 0.20850300  | -2.20264000 | -0.88168400 | C                                     | 3.80993900  | 5.19728000  | -0.03226400 |
| F                                     | 2.87706000  | -2.20414000 | -0.37937500 | C                                     | 4.97931100  | 4.48472200  | -0.31885600 |

|   |             |             |             |   |             |             |             |
|---|-------------|-------------|-------------|---|-------------|-------------|-------------|
| C | 4.92404200  | 3.10408800  | -0.52161400 | C | 2.61955400  | -1.77388700 | -2.63540800 |
| C | 3.69933700  | 2.43882700  | -0.44440800 | C | 1.87954200  | -2.95049900 | -2.31483400 |
| H | 1.68355100  | 5.09229500  | 0.28725000  | C | 0.50652700  | -2.95561300 | -2.19307200 |
| H | 3.85223100  | 6.27127900  | 0.12579400  | C | -0.29797800 | -1.77901800 | -2.38344300 |
| H | 5.92985300  | 5.00667200  | -0.38331900 | C | 0.45010200  | -0.58127900 | -2.67419200 |
| H | 5.82748100  | 2.54128700  | -0.73776800 | H | 2.33019700  | 0.31108400  | -3.15551500 |
| H | 3.65823800  | 1.36438300  | -0.59729300 | H | 2.40874000  | -3.88228300 | -2.13886800 |
| C | -0.40936700 | 3.19282300  | -0.52874400 | H | -0.00006700 | -3.88564700 | -1.94862400 |
| C | -1.68476700 | 2.99155800  | 0.02541500  | C | -1.70618300 | -1.80282500 | -2.29216400 |
| C | -2.80234800 | 3.61398700  | -0.53143000 | C | -2.53579900 | -0.60632600 | -2.67274700 |
| C | -2.66285300 | 4.44358400  | -1.64707400 | H | -2.15937000 | -2.77892000 | -2.44534900 |
| C | -1.39740000 | 4.64729900  | -2.20433400 | H | -0.08142100 | 0.31542800  | -2.98045800 |
| C | -0.27588400 | 4.02295800  | -1.65498500 | H | -2.45679300 | -0.33260300 | -3.73734200 |
| H | -1.81162500 | 2.34069300  | 0.88071100  | H | -3.59406800 | -0.79393800 | -2.46804200 |
| H | -3.77979700 | 3.43777100  | -0.09347000 | C | 4.08796500  | -1.76232200 | -2.77276100 |
| H | -3.53422600 | 4.92456600  | -2.08207500 | C | 4.83186400  | -2.95573600 | -2.90670900 |
| H | -1.28038900 | 5.29175400  | -3.07105100 | C | 4.82235700  | -0.55349700 | -2.75323900 |
| H | 0.69996100  | 4.18410600  | -2.10377000 | C | 6.22259500  | -2.94106500 | -3.01012800 |
| C | 3.56756000  | -0.54370200 | 1.58805600  | H | 4.31945900  | -3.91131400 | -2.94877900 |
| C | 4.24538300  | 0.27652900  | 2.50196400  | C | 6.20988700  | -0.53964100 | -2.87125100 |
| C | 5.64003500  | 0.34427800  | 2.47968800  | H | 4.30809700  | 0.39157500  | -2.61759500 |
| C | 6.36920700  | -0.41116800 | 1.55732000  | C | 6.92661400  | -1.73355600 | -2.99619200 |
| C | 5.70076700  | -1.23676400 | 0.64956700  | H | 6.75756100  | -3.88172700 | -3.11354200 |
| C | 4.30679400  | -1.29345800 | 0.65843900  | H | 6.73629200  | 0.41125500  | -2.84906300 |
| H | 3.69240700  | 0.87148200  | 3.22127100  | H | 8.00943000  | -1.72327000 | -3.08048600 |
| H | 6.15630500  | 0.99107400  | 3.18353500  | H | -2.25281300 | 0.28532800  | -2.09593000 |
| H | 7.45381000  | -0.35118300 | 1.54161800  | C | -3.65060900 | -2.70264900 | -0.31518900 |
| H | 6.25533400  | -1.81552600 | -0.08247100 | C | -4.86200200 | -2.05878600 | -0.17566600 |
| H | 3.78934900  | -1.90816200 | -0.07103600 | C | -4.97066200 | -0.76212300 | 0.34012800  |
| C | 1.25389200  | -2.12911900 | 2.42074300  | C | -3.77061900 | -0.14110600 | 0.68253800  |
| C | 2.15465700  | -3.17939400 | 2.65357700  | C | -2.54410400 | -0.75352700 | 0.51177900  |
| C | 1.72964600  | -4.34108500 | 3.30231700  | C | -2.42364100 | -2.02644600 | -0.09415300 |
| C | 0.40593200  | -4.46650300 | 3.72829900  | O | -6.70652700 | 0.06585500  | 1.74174800  |
| C | -0.49578800 | -3.42311300 | 3.50077700  | F | -5.98874600 | -2.70206600 | -0.56155700 |
| C | -0.07929300 | -2.26516800 | 2.84637000  | F | -3.60223900 | -3.94754700 | -0.84446600 |
| H | 3.18902100  | -3.09631600 | 2.33622800  | F | -1.41325400 | -0.07822100 | 0.85513000  |
| H | 2.43875400  | -5.14500800 | 3.47896700  | F | -3.80322000 | 1.11533900  | 1.18797900  |
| H | 0.07824800  | -5.37030100 | 4.23408200  | F | -1.33439300 | -2.78760300 | 0.23883100  |
| H | -1.52842900 | -3.51110200 | 3.82653400  | C | -6.28967500 | -0.07638000 | 0.58998600  |
| H | -0.78845000 | -1.46469200 | 2.67225100  | N | -6.95813100 | 0.37820200  | -0.50528900 |
| C | 1.85205400  | -0.60323000 | -2.81543500 | C | -8.23946400 | 1.06694000  | -0.30557900 |

|   |              |             |             |   |             |             |             |
|---|--------------|-------------|-------------|---|-------------|-------------|-------------|
| C | -6.42961400  | 0.31859100  | -1.87495100 | H | -2.35075100 | -2.89052600 | -0.93022700 |
| H | -7.29051500  | 0.29860700  | -2.55016700 | C | -2.22856900 | -2.09157300 | 2.30103200  |
| H | -5.90229800  | -0.62407500 | -2.02569600 | C | -1.09542000 | -1.89689000 | 3.10869200  |
| H | -8.20890800  | 1.56430300  | 0.66586200  | C | -0.72369900 | -2.86366300 | 4.04244100  |
| H | -8.32664500  | 1.83917700  | -1.07643500 | C | -1.47079000 | -4.03924100 | 4.16712300  |
| C | -5.51880900  | 1.50300100  | -2.20120400 | C | -2.59763400 | -4.23824500 | 3.36536800  |
| C | -9.42501100  | 0.10404900  | -0.37052400 | C | -2.98000500 | -3.26790800 | 2.43653800  |
| H | -9.34819900  | -0.64704100 | 0.42156800  | H | -0.49163100 | -1.00219200 | 2.98692100  |
| H | -10.36771000 | 0.64719900  | -0.24078300 | H | 0.15788000  | -2.70776300 | 4.65752300  |
| H | -9.46090000  | -0.41512600 | -1.33446400 | H | -1.17173000 | -4.79958500 | 4.88290300  |
| H | -6.04959800  | 2.45262300  | -2.07151600 | H | -3.17932000 | -5.15084100 | 3.45987800  |
| H | -4.64338800  | 1.50940800  | -1.54654100 | H | -3.84996700 | -3.43599500 | 1.80963300  |
| H | -5.16923400  | 1.44591800  | -3.23762500 | C | -3.78872100 | 1.98976700  | -1.41384300 |
|   |              |             |             | C | -5.09865700 | 2.45392900  | -1.21532000 |
|   |              |             |             | C | -6.07161500 | 2.24592600  | -2.19373700 |
|   |              |             |             | C | -5.74892600 | 1.56647600  | -3.37201400 |
|   |              |             |             | C | -4.44853200 | 1.09866300  | -3.57523500 |
|   |              |             |             | C | -3.47266700 | 1.30815300  | -2.59992200 |
|   |              |             |             | H | -5.36491500 | 2.96026600  | -0.29274100 |
|   |              |             |             | H | -7.08389800 | 2.60525700  | -2.03188900 |
|   |              |             |             | H | -6.51170600 | 1.39603600  | -4.12634300 |
|   |              |             |             | H | -4.19661900 | 0.56065400  | -4.48440400 |
|   |              |             |             | H | -2.46558300 | 0.92448400  | -2.74533900 |
|   |              |             |             | C | -1.89707400 | 3.86208100  | -0.10150600 |
|   |              |             |             | C | -2.65601300 | 4.95404000  | -0.54794200 |
|   |              |             |             | C | -2.13046900 | 6.24585700  | -0.47228200 |
|   |              |             |             | C | -0.85018200 | 6.45554100  | 0.04750900  |
|   |              |             |             | C | -0.08670600 | 5.36976000  | 0.48588700  |
|   |              |             |             | C | -0.60442200 | 4.07708400  | 0.40659900  |
|   |              |             |             | H | -3.64866100 | 4.79948200  | -0.95951900 |
|   |              |             |             | H | -2.72136500 | 7.08817600  | -0.82082100 |
|   |              |             |             | H | -0.44498600 | 7.46195500  | 0.10177000  |
|   |              |             |             | H | 0.91468600  | 5.52481600  | 0.87719400  |
|   |              |             |             | H | 0.00123100  | 3.23136100  | 0.72170900  |
|   |              |             |             | C | 1.46169500  | -1.79960300 | 0.79290600  |
|   |              |             |             | C | 0.78103700  | -2.12282800 | -0.39913300 |
|   |              |             |             | C | 0.50885800  | -1.05539000 | -1.28732700 |
|   |              |             |             | C | 0.94015400  | 0.25786600  | -1.02310500 |
|   |              |             |             | C | 1.69045900  | 0.57248500  | 0.16874800  |
|   |              |             |             | C | 1.88336200  | -0.50899900 | 1.08188300  |
|   |              |             |             | H | 1.69507500  | -2.59347600 | 1.49696000  |

**TSS<sub>0</sub>**

SCF Energy = -3634.372197 a.u.

Gibbs Free Energy = -3633.600775 a.u.

|   |             |             |             |                                       |            |             |             |
|---|-------------|-------------|-------------|---------------------------------------|------------|-------------|-------------|
| H | -0.00072800 | -1.25317400 | -2.22689200 | H                                     | 8.04428700 | 2.32710700  | 3.75399500  |
| H | 0.88507000  | 1.00403100  | -1.81232200 | H                                     | 7.80999300 | 2.97743900  | 2.11929600  |
| C | 2.37665500  | 1.81226600  | 0.26077100  | H                                     | 9.03687700 | -0.71931500 | -0.03108100 |
| C | 2.85861500  | 2.39007000  | 1.56929000  | H                                     | 7.57757500 | -1.17251100 | -0.92617700 |
| H | 2.05728400  | 2.55966600  | -0.46524500 | H                                     | 8.81713900 | -0.15917200 | -1.69968100 |
| H | 2.48440900  | -0.34300500 | 1.96842700  | F                                     | 3.91662100 | -2.63507700 | -2.53758800 |
| H | 3.39848500  | 1.65558500  | 2.17138000  | F                                     | 5.29658900 | -2.23744000 | -0.20034700 |
| H | 3.54593700  | 3.22171500  | 1.38321400  |                                       |            |             |             |
| H | 2.03309800  | 2.78370200  | 2.18589300  | <b>TSS<sub>m</sub></b>                |            |             |             |
| C | 0.26791900  | -3.47907800 | -0.67653400 | SCF Energy = -3634.371398 a.u.        |            |             |             |
| C | 0.17885500  | -3.96781200 | -1.99585500 | Gibbs Free Energy = -3633.598967 a.u. |            |             |             |
| C | -0.20453800 | -4.30368200 | 0.36441300  |                                       |            |             |             |
| C | -0.38362300 | -5.21527000 | -2.26430800 | Cu                                    | 1.20127000 | 0.40348100  | 0.00852300  |
| H | 0.57595500  | -3.37216700 | -2.81298000 | C                                     | 3.75128400 | -0.59137000 | -1.74389300 |
| C | -0.75961800 | -5.55425200 | 0.09442000  | C                                     | 4.46159400 | -1.26188600 | -2.74897200 |
| H | -0.17493800 | -3.94448600 | 1.38750600  | C                                     | 5.47610500 | -0.61311500 | -3.45393100 |
| C | -0.86038400 | -6.01553300 | -1.22098200 | C                                     | 5.78673500 | 0.71746700  | -3.16528200 |
| H | -0.43849400 | -5.56884400 | -3.29062600 | C                                     | 5.09121800 | 1.39707500  | -2.16376600 |
| H | -1.13226300 | -6.15998300 | 0.91614400  | C                                     | 4.07865000 | 0.75488000  | -1.43886000 |
| H | -1.30061900 | -6.98625300 | -1.43112800 | H                                     | 4.21270500 | -2.29145900 | -2.98857600 |
| C | 3.67800400  | 0.99184100  | -2.15404400 | H                                     | 6.01657800 | -1.14376000 | -4.23234800 |
| C | 3.51537500  | -0.27798500 | -2.66149100 | H                                     | 6.56881300 | 1.22825900  | -3.71951000 |
| C | 4.04133600  | -1.39456900 | -2.00194700 | H                                     | 5.33507900 | 2.43319900  | -1.94962700 |
| C | 4.70471500  | -1.17435500 | -0.80081300 | P                                     | 2.35110400 | -1.38619100 | -0.84406600 |
| C | 4.84486000  | 0.08388300  | -0.23585100 | P                                     | 3.15194300 | 1.58431900  | -0.07152900 |
| C | 4.18274300  | 1.20228000  | -0.83883200 | C                                     | 3.10159200 | -2.27799200 | 0.57141900  |
| O | 5.02559900  | -0.02869600 | 2.15527000  | C                                     | 4.47582500 | -2.25450800 | 0.84468000  |
| F | 2.80433500  | -0.46195400 | -3.79406500 | C                                     | 4.96880100 | -2.85113600 | 2.00801200  |
| F | 3.05566300  | 2.03254000  | -2.77596400 | C                                     | 4.09869000 | -3.48572600 | 2.89668600  |
| F | 4.79447300  | 2.43694400  | -0.62194000 | C                                     | 2.72738900 | -3.52189000 | 2.62292600  |
| C | 5.57654200  | 0.22728700  | 1.07735500  | C                                     | 2.22760100 | -2.91231900 | 1.47343100  |
| N | 6.86870500  | 0.64544800  | 1.00797800  | H                                     | 5.16000300 | -1.75980300 | 0.16327600  |
| C | 7.62024900  | 0.81204300  | 2.25714100  | H                                     | 6.03367200 | -2.81506300 | 2.21890900  |
| C | 7.58335700  | 0.88799200  | -0.25066300 | H                                     | 4.48576500 | -3.94745400 | 3.80059300  |
| H | 8.30284300  | 1.69311200  | -0.06738900 | H                                     | 2.04245200 | -4.01505700 | 3.30690700  |
| H | 6.87876200  | 1.25975600  | -0.99403900 | H                                     | 1.15979400 | -2.93140300 | 1.27619600  |
| H | 7.26040400  | 0.06966700  | 2.97251500  | C                                     | 1.70017300 | -2.67157800 | -1.96888700 |
| H | 8.67201300  | 0.59464400  | 2.04695000  | C                                     | 0.77896800 | -2.26078100 | -2.94679800 |
| C | 8.29721600  | -0.36564200 | -0.75774600 | C                                     | 0.19883900 | -3.19719000 | -3.80215900 |
| C | 7.46297000  | 2.22073000  | 2.83130000  | C                                     | 0.52164200 | -4.55220300 | -3.67781200 |
| H | 6.41164200  | 2.42010600  | 3.05963700  | C                                     | 1.43524800 | -4.96604300 | -2.70495100 |

|   |             |             |             |   |             |             |             |
|---|-------------|-------------|-------------|---|-------------|-------------|-------------|
| C | 2.02691400  | -4.03053100 | -1.85362900 | H | -2.72017800 | 2.82184300  | -2.57574300 |
| H | 0.50092000  | -1.21301900 | -3.02016400 | H | -2.35637400 | 4.42011500  | -1.94219500 |
| H | -0.51693700 | -2.87239400 | -4.55172100 | H | -1.08228700 | 3.47265500  | -2.72401000 |
| H | 0.05791800  | -5.28328100 | -4.33384000 | C | -1.45463300 | -2.72014300 | 0.73515600  |
| H | 1.68700200  | -6.01813200 | -2.60587400 | C | -1.75101100 | -3.01717800 | 2.08017500  |
| H | 2.72803000  | -4.36060500 | -1.09366700 | C | -1.20566500 | -3.79128700 | -0.14376600 |
| C | 4.18861100  | 1.24618900  | 1.40414100  | C | -1.76725200 | -4.33570000 | 2.53434500  |
| C | 5.58967300  | 1.17348100  | 1.36121600  | H | -2.00113700 | -2.20593800 | 2.75832900  |
| C | 6.30969100  | 0.84552100  | 2.51072800  | C | -1.22836400 | -5.10943900 | 0.31171900  |
| C | 5.63868900  | 0.57978400  | 3.70781500  | H | -0.96016300 | -3.58580100 | -1.18024200 |
| C | 4.24423400  | 0.64684300  | 3.75712700  | C | -1.50061500 | -5.38915800 | 1.65382300  |
| C | 3.52167200  | 0.97732600  | 2.60995400  | H | -2.00248300 | -4.54250400 | 3.57510500  |
| H | 6.11710200  | 1.35235400  | 0.42926700  | H | -1.01600300 | -5.91787300 | -0.38281400 |
| H | 7.39372400  | 0.78846800  | 2.46947700  | H | -1.51177900 | -6.41591900 | 2.00880100  |
| H | 6.20159200  | 0.31417500  | 4.59808100  | C | -3.12645000 | 2.42068300  | 1.74348200  |
| H | 3.71841800  | 0.43138200  | 4.68271700  | C | -3.44037400 | 1.15797400  | 2.21472800  |
| H | 2.43520700  | 1.00764300  | 2.64000700  | C | -4.25640200 | 0.30521700  | 1.47916100  |
| C | 3.23202200  | 3.37812000  | -0.41254900 | C | -4.76378700 | 0.73628800  | 0.24870300  |
| C | 4.31923900  | 4.19462200  | -0.06609300 | C | -4.41017700 | 1.99034600  | -0.20934600 |
| C | 4.28959700  | 5.55849300  | -0.36330400 | C | -3.44314800 | 2.83493200  | 0.41656600  |
| C | 3.17823300  | 6.11487000  | -1.00320400 | O | -5.07069600 | -1.05769200 | -1.29122300 |
| C | 2.08789700  | 5.30818000  | -1.34031700 | F | -2.90434000 | 0.72948600  | 3.38145200  |
| C | 2.11046900  | 3.94568200  | -1.04089700 | F | -2.22947200 | 3.17709900  | 2.44078100  |
| H | 5.18074000  | 3.77152400  | 0.44147200  | F | -4.88137100 | 2.40575300  | -1.42744400 |
| H | 5.13324800  | 6.18694900  | -0.09229100 | F | -3.62601900 | 4.20748100  | 0.23234300  |
| H | 3.15831900  | 7.17715900  | -1.22943000 | C | -5.60755500 | -0.19711800 | -0.59034700 |
| H | 1.21569600  | 5.73910200  | -1.82344500 | N | -6.95553400 | -0.03210600 | -0.52502800 |
| H | 1.25068100  | 3.32359500  | -1.27815500 | C | -7.80113100 | -0.92476100 | -1.32598900 |
| C | -1.79730600 | -0.90905000 | -0.99670200 | C | -7.62840400 | 0.93454400  | 0.34947200  |
| C | -1.36850200 | -1.31823700 | 0.28041800  | H | -6.96028000 | 1.18702400  | 1.17448300  |
| C | -0.77487800 | -0.33747300 | 1.10722900  | H | -8.49883700 | 0.43316300  | 0.78773600  |
| C | -0.71968700 | 1.01567800  | 0.72294400  | H | -8.73394100 | -0.39522700 | -1.54097900 |
| C | -1.28288800 | 1.45246200  | -0.52892700 | H | -7.29450200 | -1.11113100 | -2.27563300 |
| C | -1.73209600 | 0.41786600  | -1.40236100 | C | -8.05708600 | 2.20213400  | -0.39111300 |
| H | -2.25043900 | -1.63712600 | -1.66039900 | C | -8.08147500 | -2.24624200 | -0.60968500 |
| H | -0.40990000 | -0.61394000 | 2.09215300  | H | -8.58005700 | -2.07758100 | 0.35110100  |
| H | -0.45983500 | 1.76606900  | 1.46516300  | H | -8.72840900 | -2.88461600 | -1.22171700 |
| C | -1.61661600 | 2.82803800  | -0.70176800 | H | -7.14452500 | -2.77944600 | -0.42477100 |
| C | -1.95657300 | 3.40822100  | -2.05600700 | H | -7.18602500 | 2.71107200  | -0.81156000 |
| H | -1.07603900 | 3.51187700  | -0.04650200 | H | -8.74520500 | 1.96900300  | -1.21099100 |
| H | -2.14271100 | 0.68427400  | -2.37084700 | H | -8.56736800 | 2.88780000  | 0.29408400  |

|                                       |             |             |             |   |             |             |             |
|---------------------------------------|-------------|-------------|-------------|---|-------------|-------------|-------------|
| F                                     | -4.58630500 | -0.91758800 | 1.98136700  | C | -2.15463200 | 0.07043500  | 1.53435000  |
| <b>HSi(OMe)<sub>2</sub>Me</b>         |             |             |             | C | -2.91745700 | -0.92337600 | 2.16925300  |
| SCF Energy = -560.4833973 a.u.        |             |             |             | C | -3.03637100 | -0.93497900 | 3.55914300  |
| Gibbs Free Energy = -560.3860023 a.u. |             |             |             | C | -2.38649000 | 0.03582900  | 4.32716200  |
|                                       |             |             |             | C | -1.62075400 | 1.02240000  | 3.70248600  |
| Si                                    | -0.54739300 | -0.00018400 | 0.31253500  | C | -1.50609500 | 1.04137000  | 2.31147100  |
| H                                     | -0.28561100 | -0.00058900 | 1.78264100  | H | -3.40537100 | -1.69580300 | 1.58289500  |
| C                                     | -2.35116900 | -0.00134200 | -0.13591300 | H | -3.62707100 | -1.70779900 | 4.04289000  |
| H                                     | -2.85291300 | -0.88927600 | 0.26352400  | H | -2.46961500 | 0.01640200  | 5.41013900  |
| H                                     | -2.48378000 | 0.00025900  | -1.22338400 | H | -1.10127500 | 1.76976900  | 4.29492800  |
| H                                     | -2.85510800 | 0.88400100  | 0.26647600  | H | -0.89018600 | 1.79323200  | 1.82658700  |
| O                                     | 0.12126200  | 1.38775500  | -0.31128500 | C | -3.48195600 | 0.58469700  | -1.05472600 |
| O                                     | 0.12318900  | -1.38673500 | -0.31224300 | C | -3.44292300 | 0.92288700  | -2.41837400 |
| C                                     | 1.45294700  | -1.79960100 | -0.00637900 | C | -4.61022700 | 1.28727200  | -3.08815100 |
| C                                     | 1.45139700  | 1.80049700  | -0.00679600 | C | -5.82558200 | 1.33569900  | -2.39848100 |
| H                                     | 1.52457500  | -2.88229600 | -0.15474200 | C | -5.86812100 | 1.01788900  | -1.03923100 |
| H                                     | 2.18030100  | -1.31375800 | -0.66958000 | C | -4.70274700 | 0.64116700  | -0.36675200 |
| H                                     | 1.73045800  | -1.57928800 | 1.03447200  | H | -2.49523700 | 0.90430100  | -2.95193800 |
| H                                     | 1.73016600  | 1.57965600  | 1.03361300  | H | -4.57009000 | 1.54306500  | -4.14313200 |
| H                                     | 2.17795700  | 1.31508400  | -0.67117100 | H | -6.73394900 | 1.62738100  | -2.91792500 |
| H                                     | 1.52279400  | 2.88328600  | -0.15459400 | H | -6.80939000 | 1.06136500  | -0.49854200 |
|                                       |             |             |             | H | -4.74853300 | 0.39617400  | 0.68928800  |
| <b>TS6</b>                            |             |             |             | C | 1.28261700  | -1.15854600 | 1.47477400  |
| SCF Energy = -2698.602733 a.u.        |             |             |             | C | 0.56357100  | -1.99732800 | 2.33704200  |
| Gibbs Free Energy = -2698.097422 a.u. |             |             |             | C | 0.73980900  | -1.89680200 | 3.71900100  |
|                                       |             |             |             | C | 1.64159400  | -0.97031700 | 4.24680400  |
| Si                                    | 1.98598700  | 3.28448400  | 0.18151600  | C | 2.36860300  | -0.13812100 | 3.38987000  |
| Cu                                    | 0.13745900  | 0.94838900  | -0.83195900 | C | 2.18480500  | -0.22156500 | 2.00999400  |
| H                                     | 0.74990300  | 2.61264500  | 0.72773100  | H | -0.14455500 | -2.71468900 | 1.93531200  |
| C                                     | -1.70114500 | -1.68788800 | -0.69632900 | H | 0.16694100  | -2.53923300 | 4.38147800  |
| C                                     | -2.79594500 | -2.50402200 | -1.01060200 | H | 1.77319800  | -0.89179700 | 5.32231200  |
| C                                     | -2.61515200 | -3.86121200 | -1.28114600 | H | 3.06778800  | 0.58755700  | 3.79582100  |
| C                                     | -1.33479300 | -4.41713500 | -1.23956000 | H | 2.72826700  | 0.45155300  | 1.35072800  |
| C                                     | -0.23429400 | -3.61425100 | -0.93679100 | C | 2.47601100  | -2.00373000 | -1.04771300 |
| C                                     | -0.39922100 | -2.24833300 | -0.66762200 | C | 3.32858000  | -2.81323200 | -0.28269800 |
| H                                     | -3.79364700 | -2.07731300 | -1.04776900 | C | 4.42213200  | -3.44194000 | -0.88257500 |
| H                                     | -3.47296400 | -4.48113900 | -1.52536400 | C | 4.66905000  | -3.27229600 | -2.24705700 |
| H                                     | -1.19033600 | -5.47319700 | -1.44837600 | C | 3.82232200  | -2.46708400 | -3.01493200 |
| H                                     | 0.75957800  | -4.05055800 | -0.91785700 | C | 2.73504400  | -1.83005700 | -2.41743100 |
| P                                     | -1.88962000 | 0.10542700  | -0.28350400 | H | 3.14199400  | -2.95066500 | 0.77798100  |
| P                                     | 1.02988700  | -1.12664500 | -0.34250800 | H | 5.07951200  | -4.06527700 | -0.28287100 |

|                               |            |             |             |                                       |             |             |             |
|-------------------------------|------------|-------------|-------------|---------------------------------------|-------------|-------------|-------------|
| H                             | 5.52164300 | -3.76074200 | -2.71029400 | SCF Energy = -659.8345738 a.u.        |             |             |             |
| H                             | 4.01519900 | -2.32681200 | -4.07472700 | Gibbs Free Energy = -659.7442468 a.u. |             |             |             |
| H                             | 2.08858400 | -1.18859400 | -3.01174800 |                                       |             |             |             |
| C                             | 2.64994600 | 3.92060400  | 1.85426100  | Si                                    | -0.53147800 | -0.00835200 | 0.03009400  |
| H                             | 1.91543700 | 4.57761400  | 2.33850200  | C                                     | -2.25791600 | -0.06304700 | -0.62098200 |
| H                             | 3.58701300 | 4.48234500  | 1.75613900  | H                                     | -2.71911100 | -1.03657200 | -0.42685800 |
| H                             | 2.83570400 | 3.08006700  | 2.53593000  | H                                     | -2.26456100 | 0.10727900  | -1.70258800 |
| O                             | 3.32698200 | 2.32177000  | -0.16483300 | H                                     | -2.87592600 | 0.70979200  | -0.15258300 |
| O                             | 1.83295000 | 4.79031600  | -0.54672800 | O                                     | 0.07331900  | 1.50968300  | -0.17523300 |
| C                             | 1.26904900 | 5.13648000  | -1.79844300 | O                                     | 0.38779200  | -1.16718300 | -0.69335100 |
| C                             | 3.66539900 | 1.62046500  | -1.34798400 | C                                     | 1.60943300  | -1.68752800 | -0.16244100 |
| H                             | 1.31169300 | 6.22886000  | -1.89476200 | C                                     | 1.46919300  | 1.81447300  | -0.11654400 |
| H                             | 1.81960600 | 4.69778800  | -2.63978800 | H                                     | 1.80115200  | -2.65637600 | -0.63349400 |
| H                             | 0.22056700 | 4.82461500  | -1.88206000 | H                                     | 2.45147700  | -1.02083300 | -0.38390600 |
| H                             | 2.87456700 | 0.93831500  | -1.66986200 | H                                     | 1.55171500  | -1.83475000 | 0.92256900  |
| H                             | 3.88510700 | 2.30510500  | -2.17888400 | H                                     | 1.92928500  | 1.45869900  | 0.81409300  |
| H                             | 4.56916400 | 1.03235500  | -1.14580100 | H                                     | 2.00517300  | 1.37869400  | -0.96835600 |
| F                             | 1.11771300 | 2.50208200  | -1.50586900 | H                                     | 1.58149900  | 2.90192700  | -0.15714600 |
| <b>FSi(OMe)<sub>2</sub>Me</b> |            |             |             | F                                     | -0.51479500 | -0.33492400 | 1.62393600  |
